# Supplementary material
Source: publisher figshare collection journal article supplement (https://acs.figshare.com/ndownloader/files/24065017)

# Supporting Information for

## Copper Catalyzed Preparation of Benzo[3,4]indolo[1,2-*b*]isoquinoline-8-ones and Photoluminescence Exploration

Yiwen Hua,<sup>†,‡</sup> Zi-Yan Chen,<sup>§</sup> Hanying Diao,<sup>†</sup> Lianpeng Zhang,<sup>\*,†,‡</sup>  
Guanyinsheng Qiu,<sup>\*,†</sup> Xiaoxing Gao,<sup>†</sup> and Hongwei Zhou<sup>\*†</sup>

<sup>†</sup> College of Biological, Chemical Sciences and Engineering, Jiaxing University, Jiaxing 314001, Zhejiang, China

<sup>‡</sup> School of Materials Science and Engineering, Southwest Forestry University, Kunming 650224, China

<sup>§</sup> School of Medicine Jiaxing University, Jiaxing, 314001, China

*E-mail: LianpengZhang@zju.edu.cn (L. Zhang); qiuguanyinsheng@mail.zjxu.edu.cn (G. Qiu)*

1. Control experiment (Scheme S1)
2. The deuterium labeling studies
3. The photophysical properties of products
4. Copies of the Products  $^1\text{H}$  NMR,  $^{13}\text{C}$  NMR

## 1. Control experiment (Scheme S1)

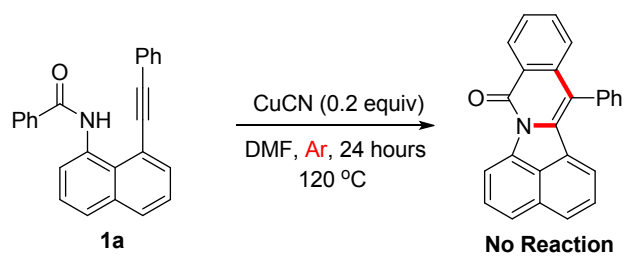

## 2. The deuterium labeling studies

$^1\text{H}$  NMR of **1a-H<sub>5</sub>**

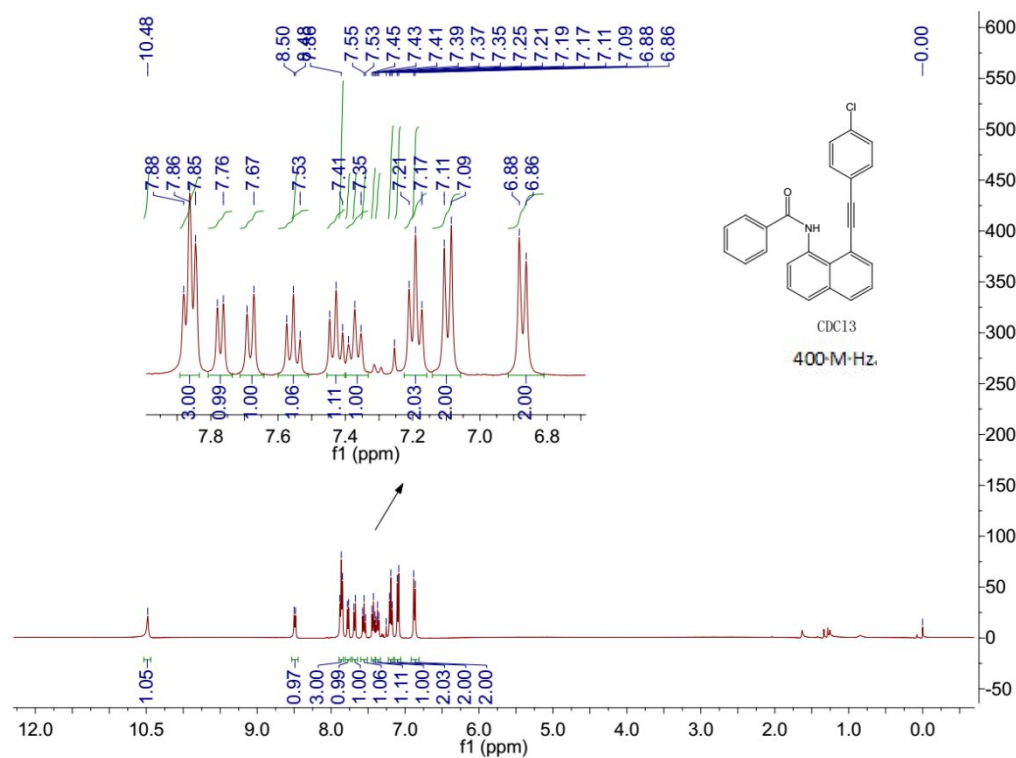

$^1\text{H}$  NMR of **1a-D<sub>5</sub>**

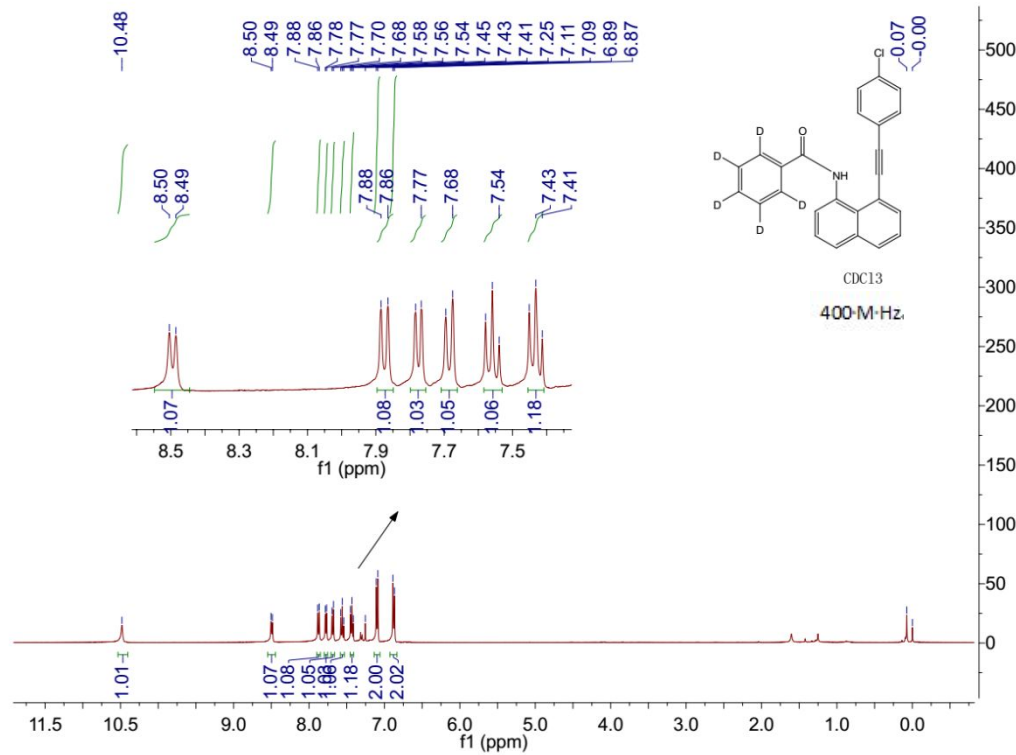

$^1\text{H}$  NMR of **2a-H<sub>5</sub>**

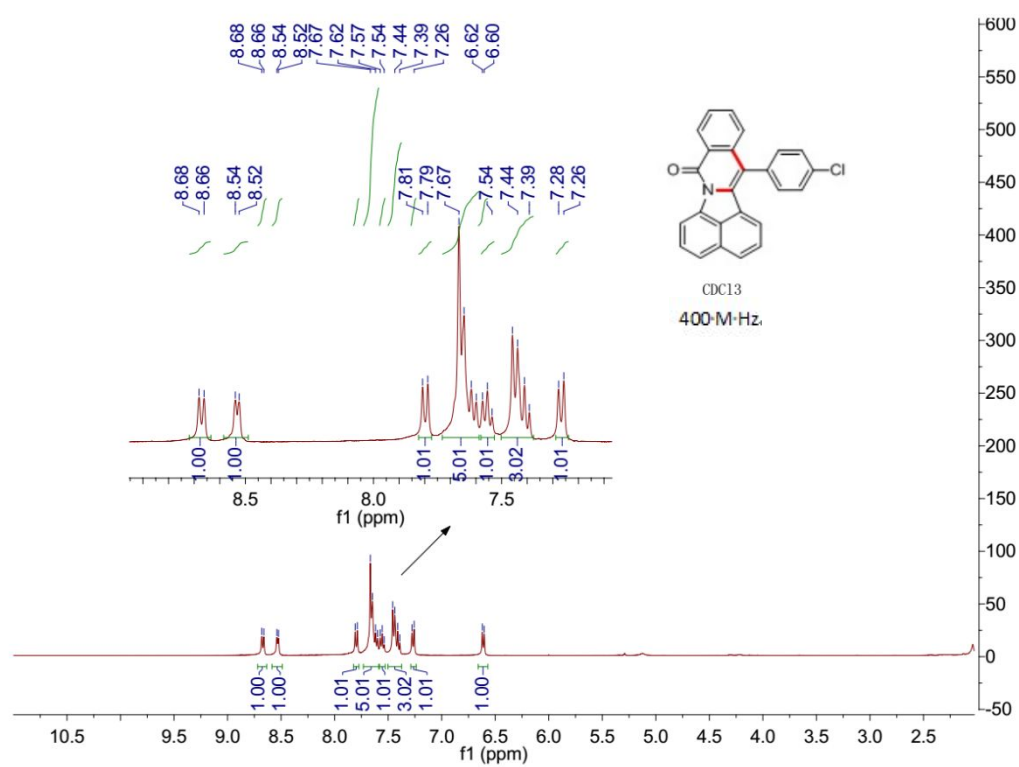

$^1\text{H}$  NMR of **2a-D<sub>5</sub>**

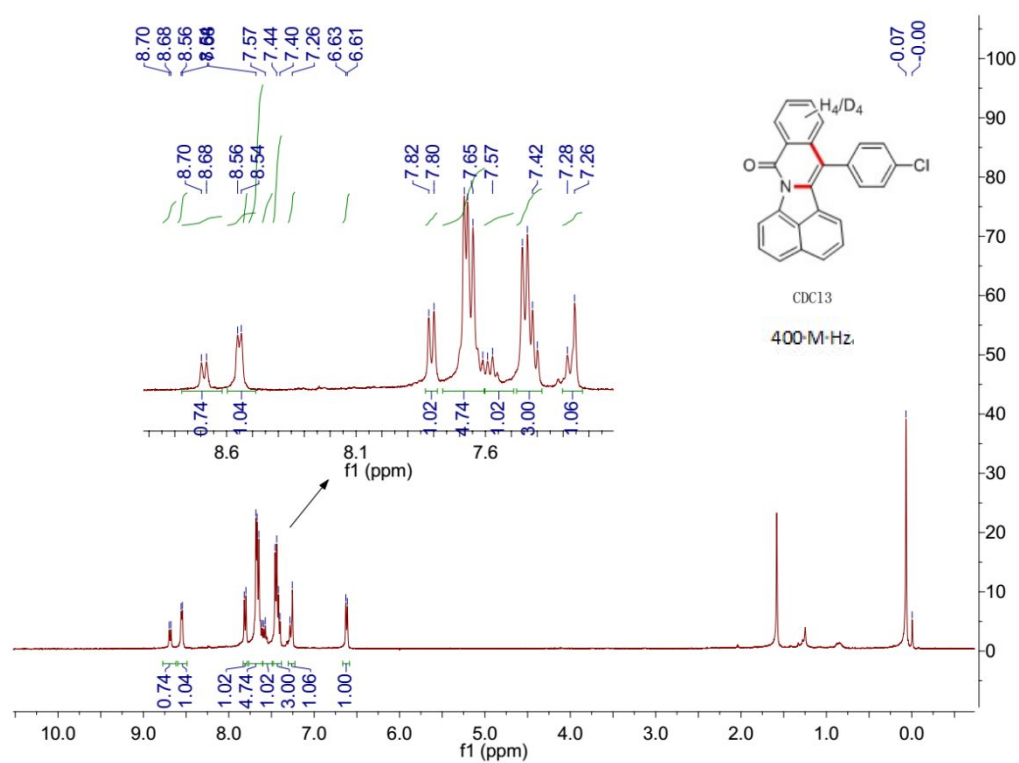

### 3. The photophysical properties of products

Absorption and emission spectra of these compounds in solutions were measured in Tetrahydrofuran (THF) with a concentration of  $10^{-5}$  M.

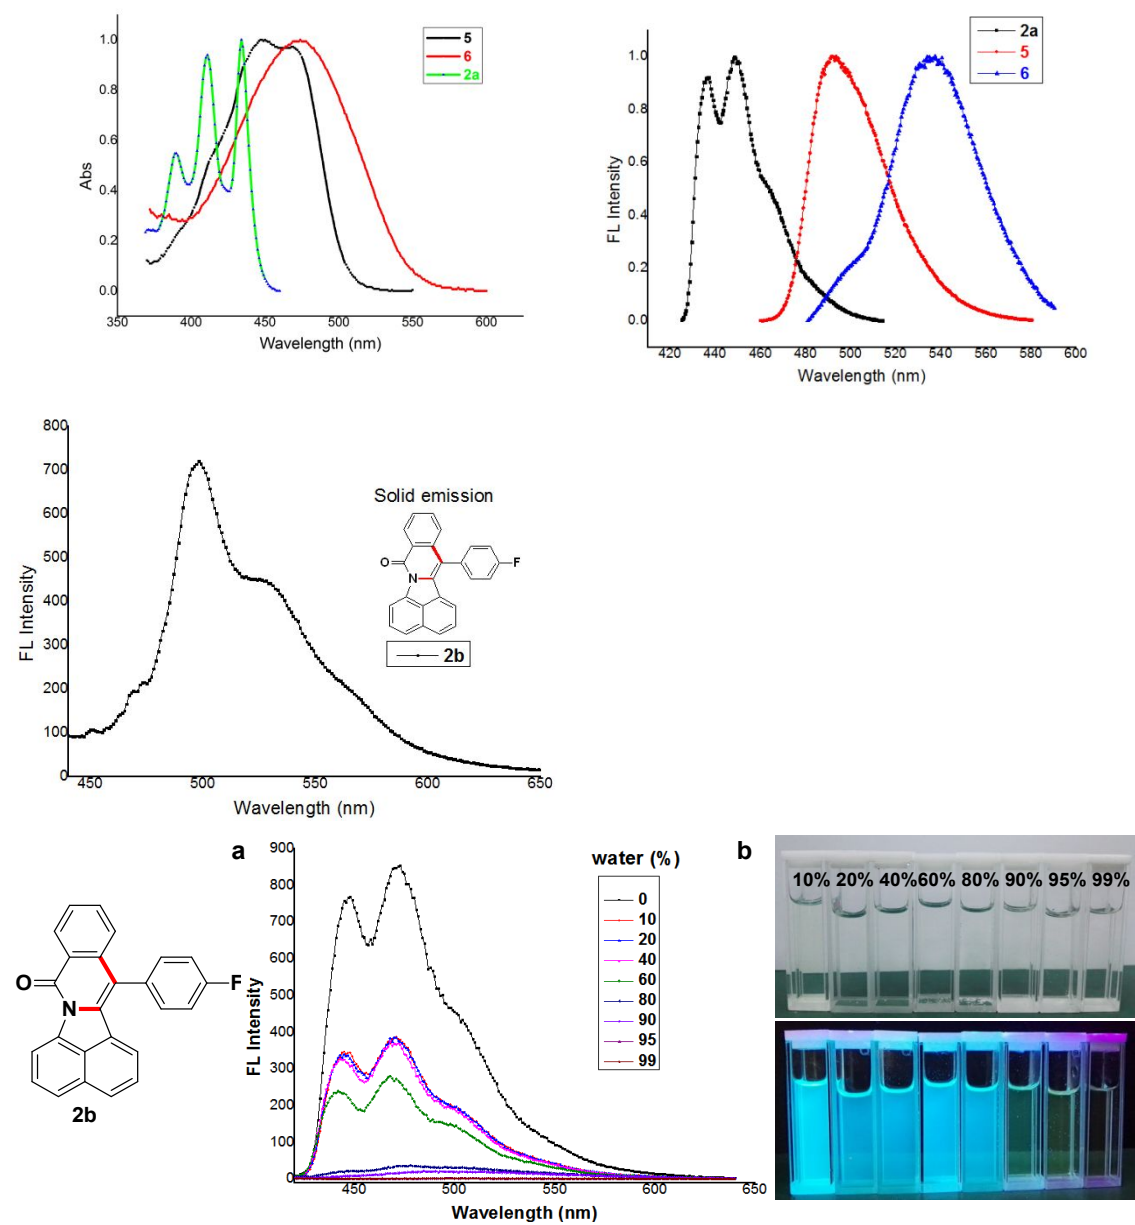

#### 4. Copies of the Products $^1\text{H}$ NMR, $^{13}\text{C}$ NMR

Figure S1  $^1\text{H}$ -NMR spectrum of **2a**

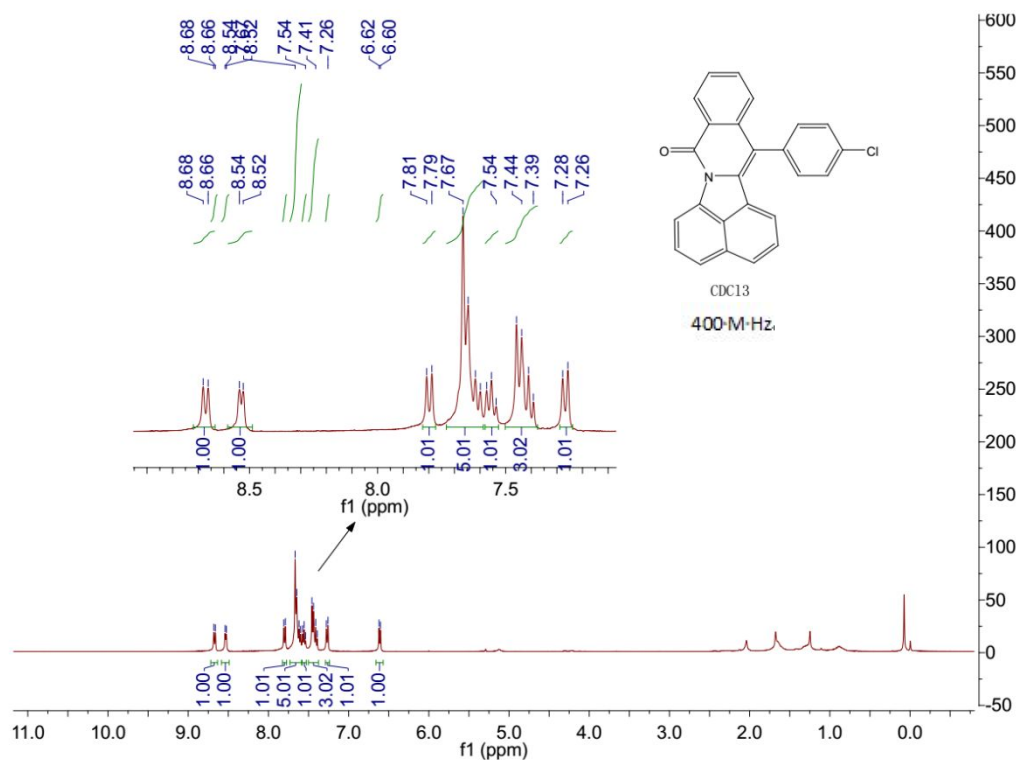

Figure S2  $^{13}\text{C}$ -NMR spectrum of **2a**

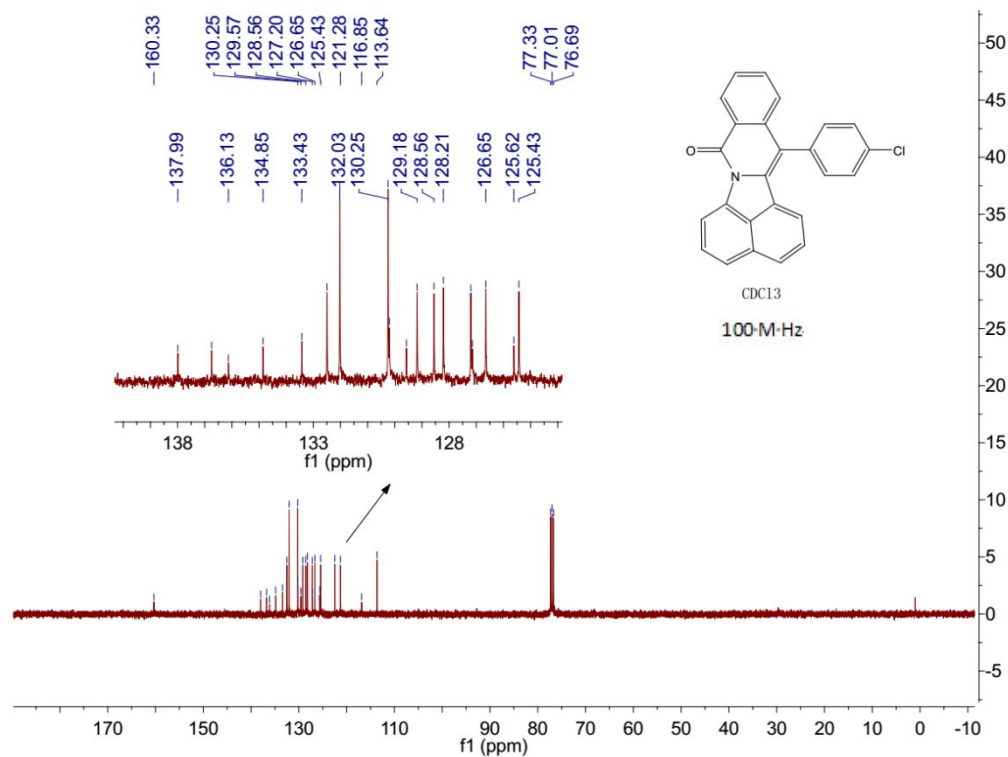

**Figure S3**  $^1\text{H}$ -NMR spectrum of **2b**

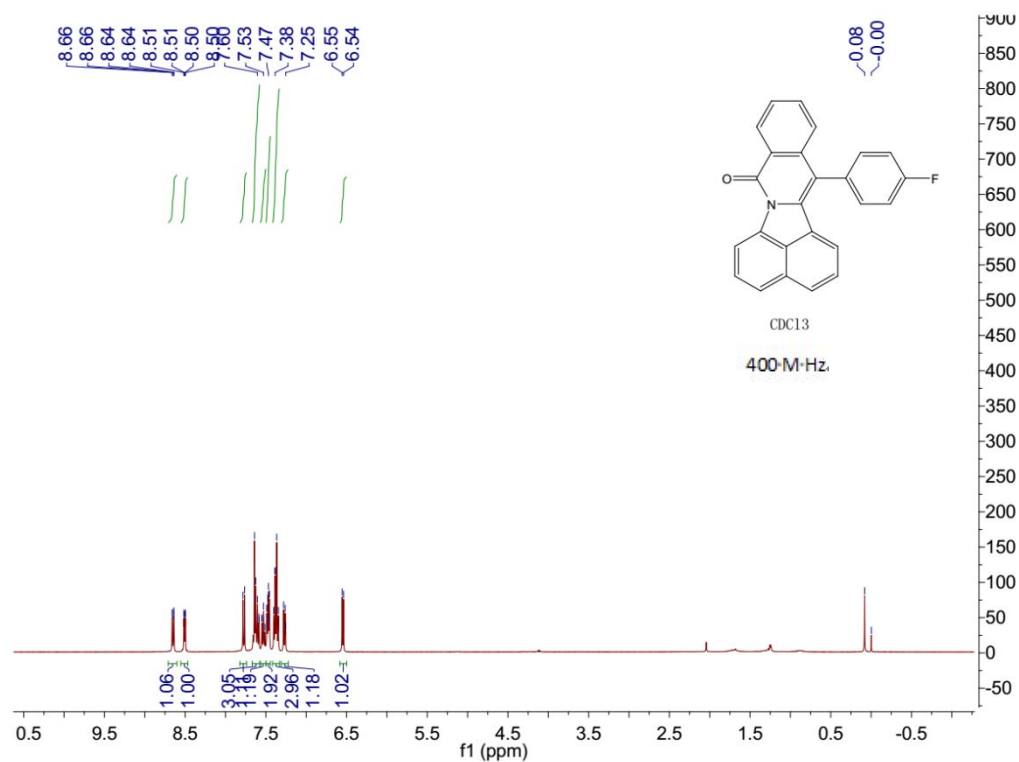

**Figure S4**  $^{13}\text{C}$ -NMR spectrum of **2b**

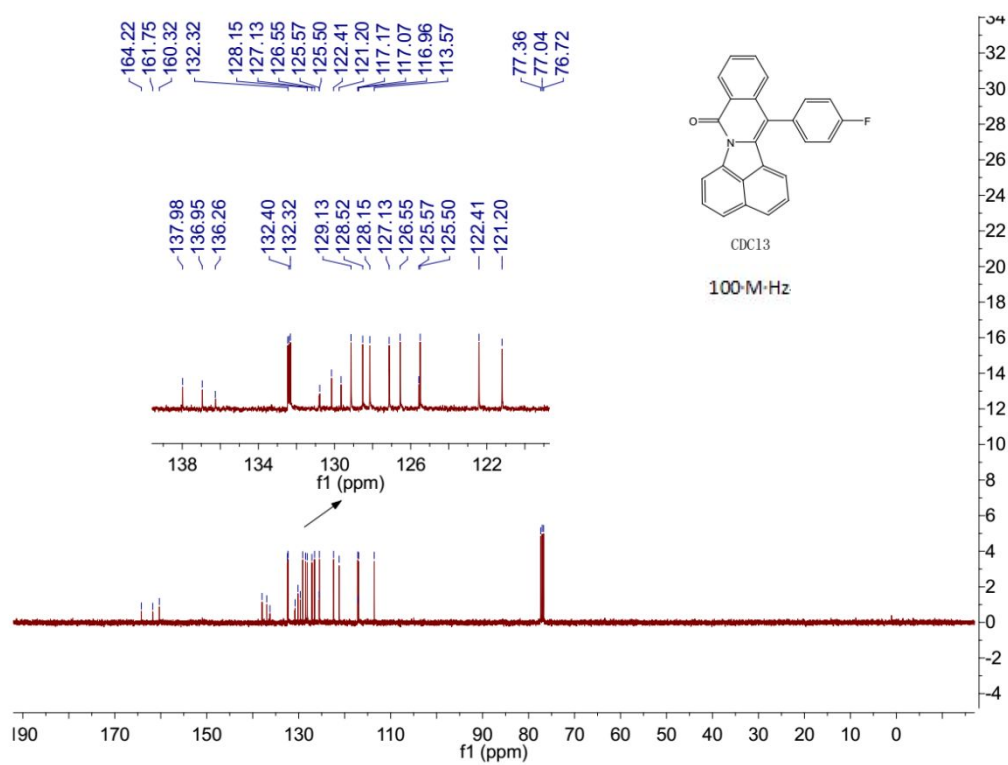



**Figure S5**  $^1\text{H}$ -NMR spectrum of **2c**

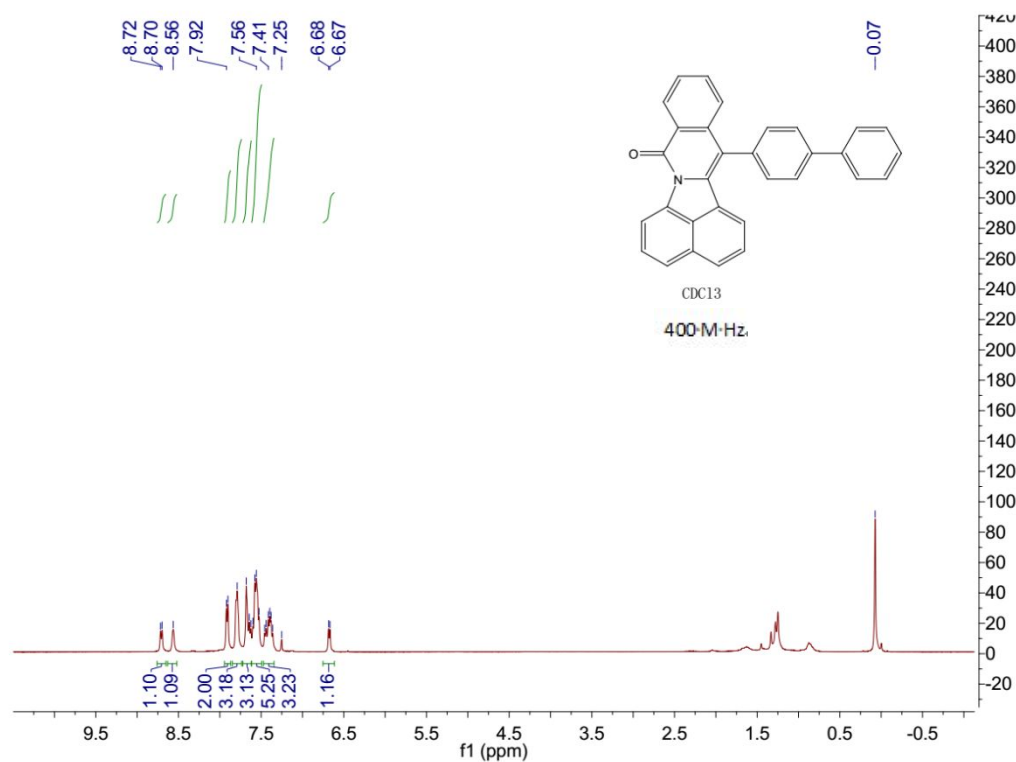

**Figure S6**  $^{13}\text{C}$ -NMR spectrum of **2c**

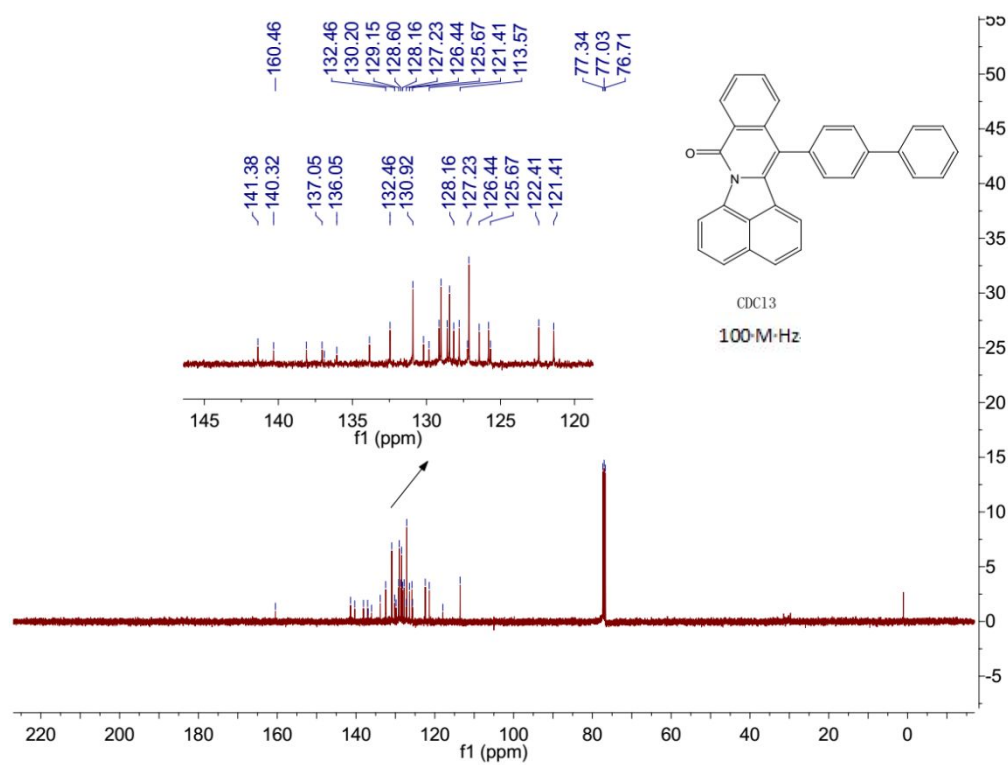

**Figure S7**  $^1\text{H}$ -NMR spectrum of **2d**

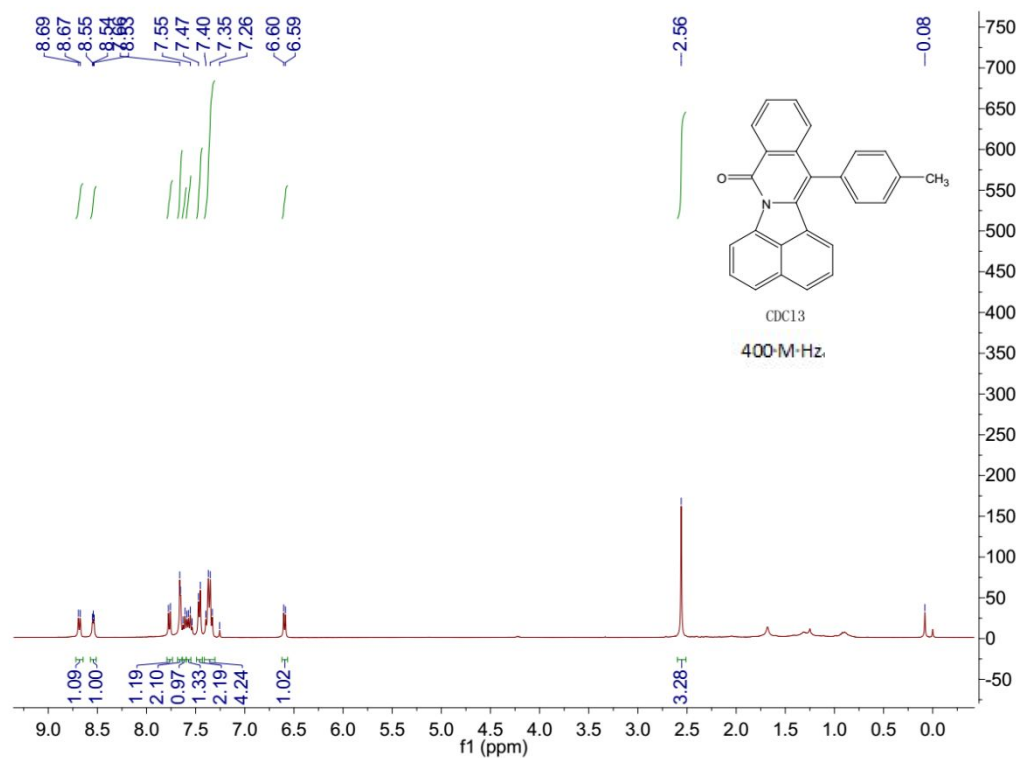

**Figure S8**  $^{13}\text{C}$ -NMR spectrum of **2d**

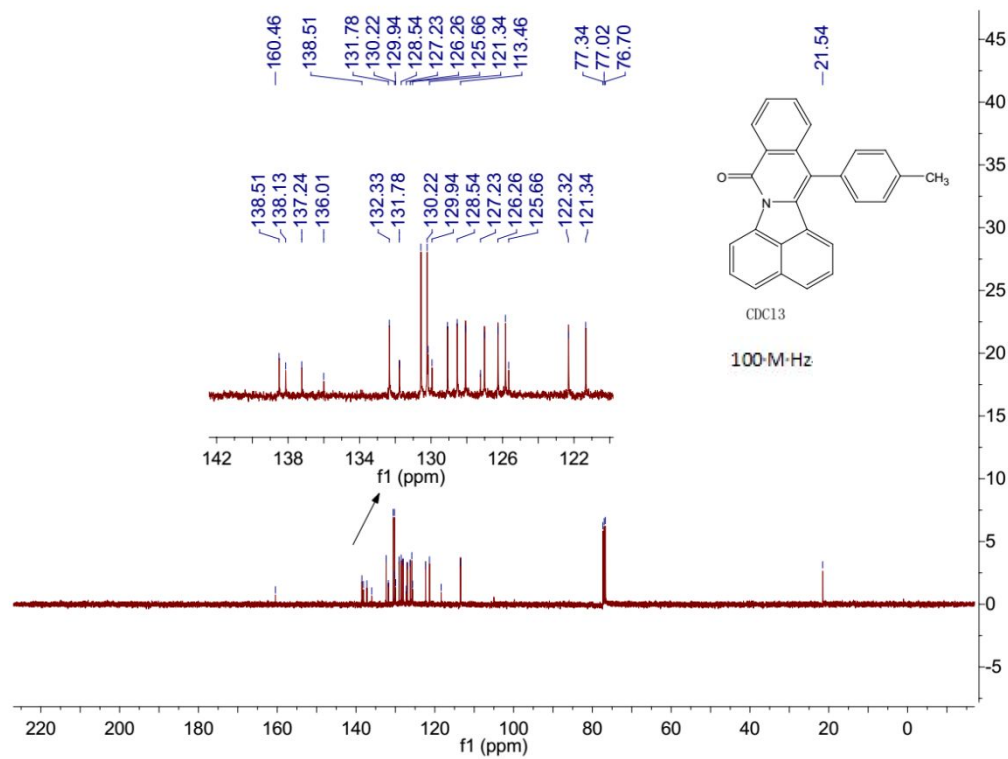

**Figure S9**  $^1\text{H}$ -NMR spectrum of **2e**

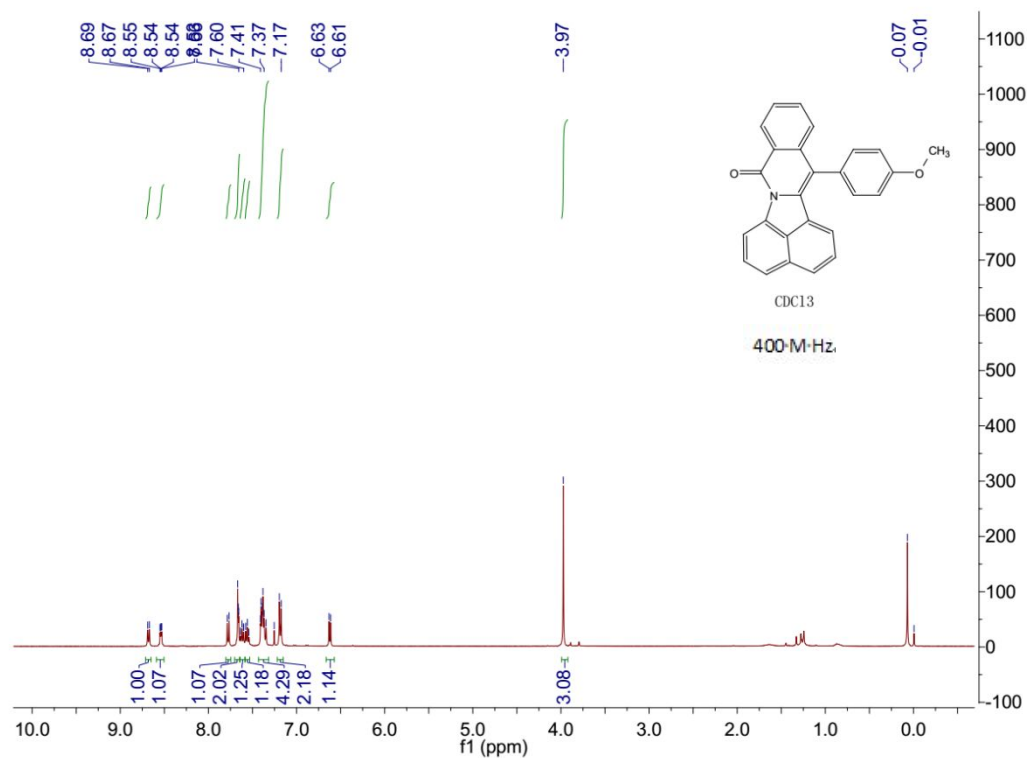

**Figure S10**  $^{13}\text{C}$ -NMR spectrum of **2e**

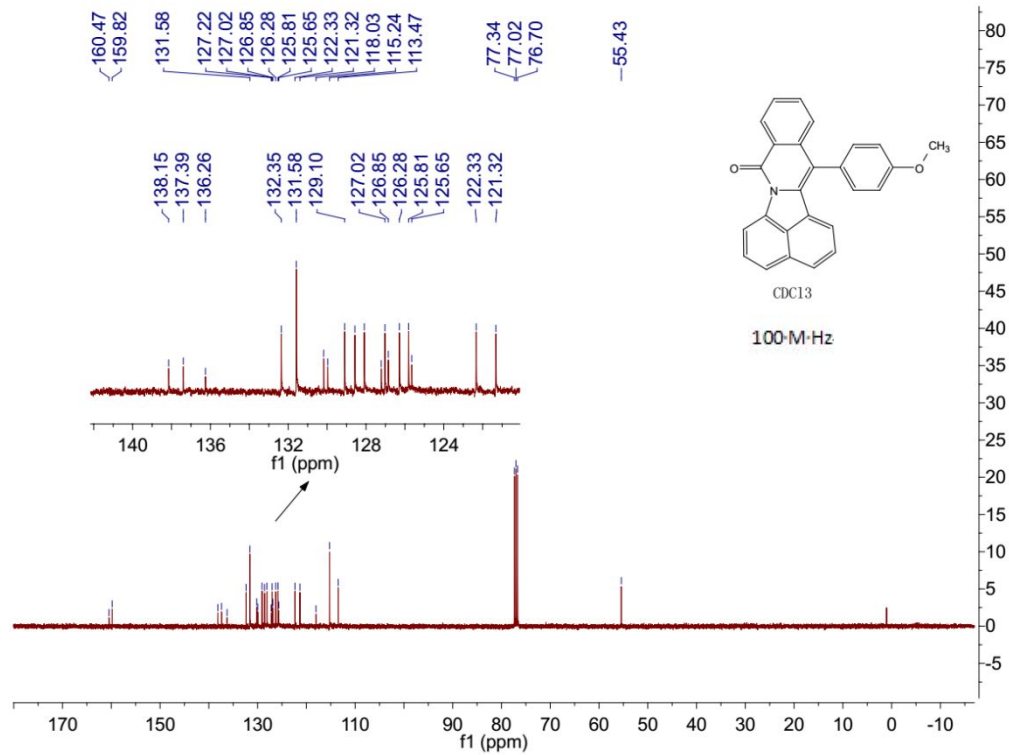

**Figure S11**  $^1\text{H}$ -NMR spectrum of **2f**

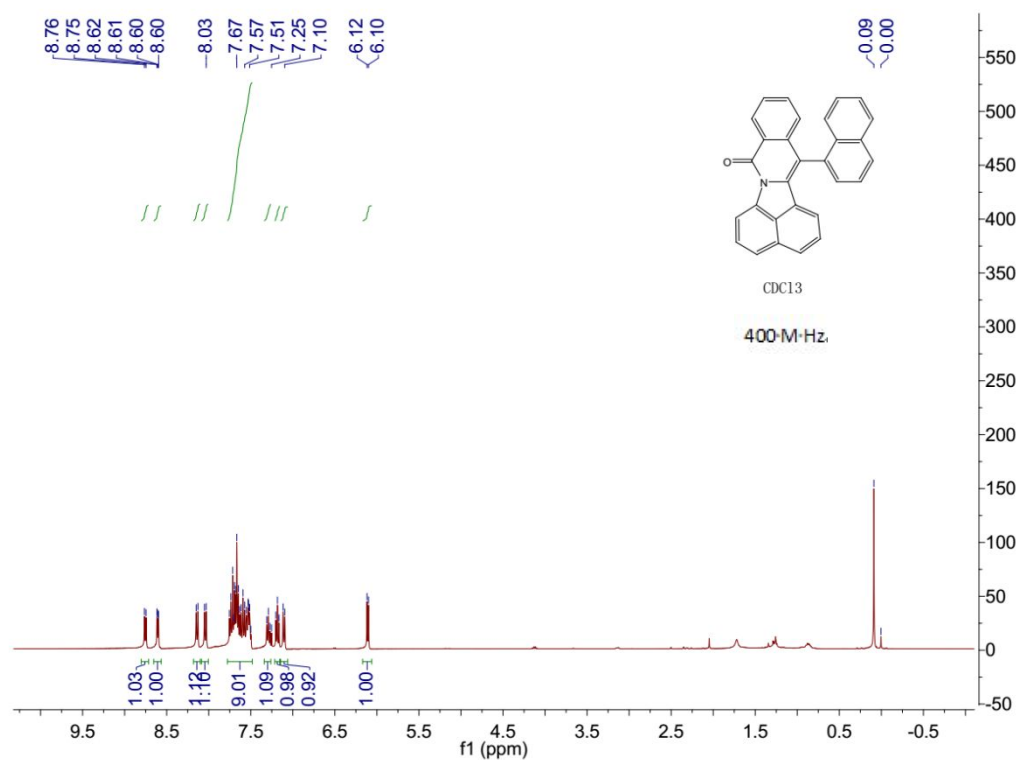

**Figure S12**  $^{13}\text{C}$ -NMR spectrum of **2f**

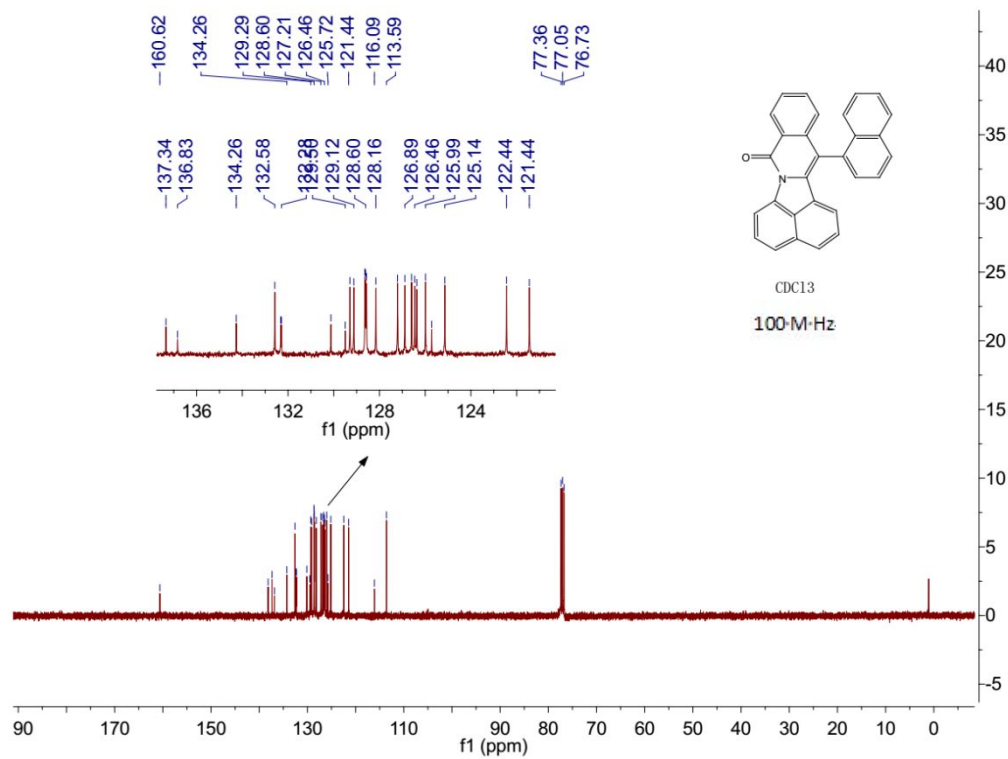

**Figure S13**  $^1\text{H}$ -NMR spectrum of **2g**

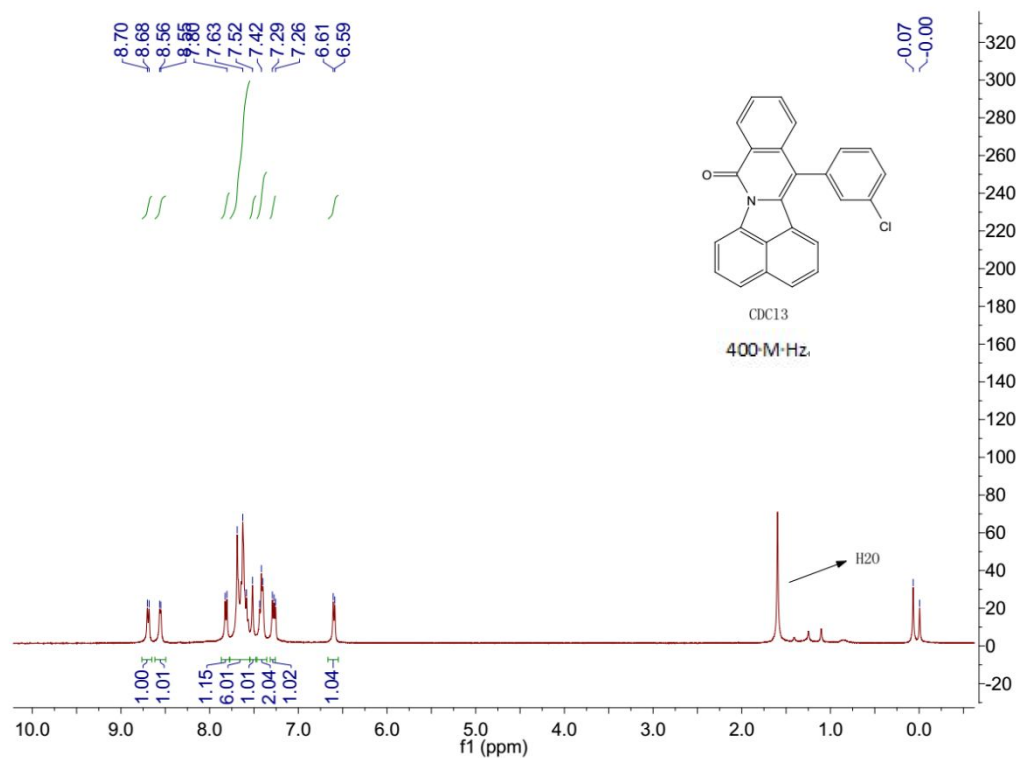

**Figure S14**  $^{13}\text{C}$ -NMR spectrum of **2g**

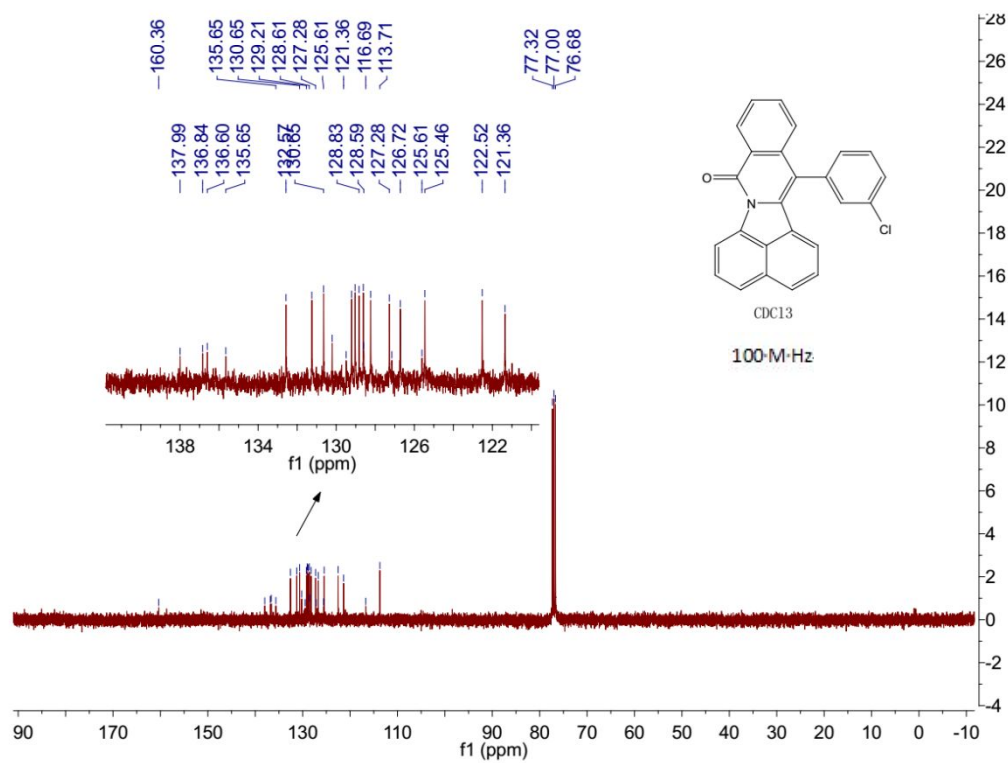

**Figure S15**  $^1\text{H}$ -NMR spectrum of **2h**

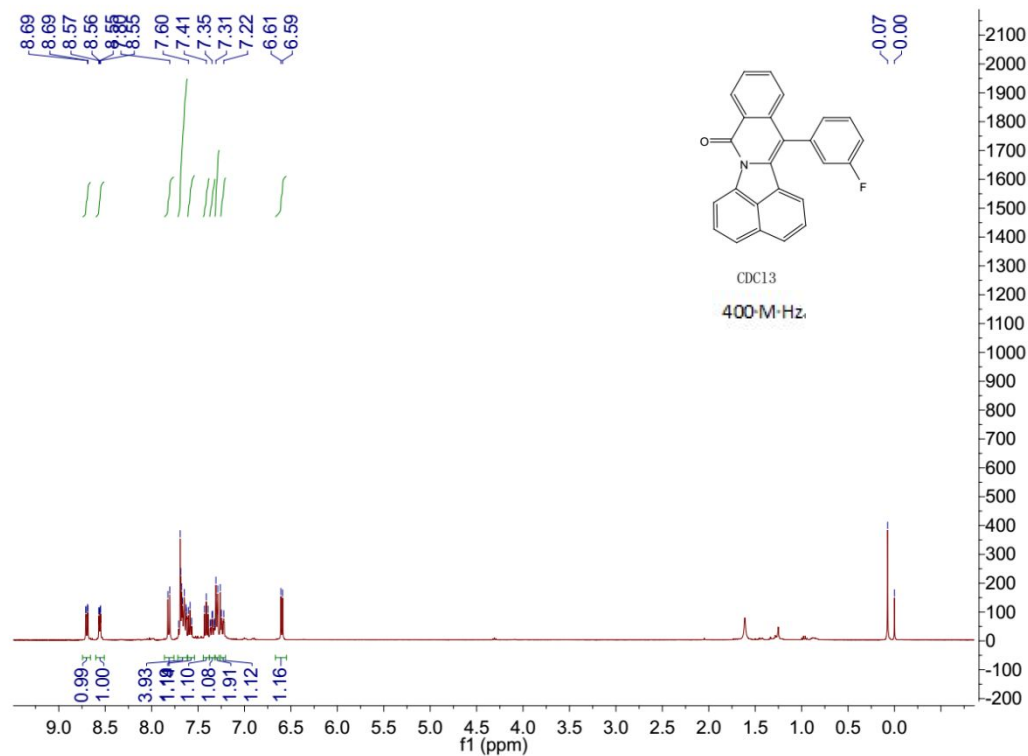

**Figure S16**  $^{13}\text{C}$ -NMR spectrum of **2h**

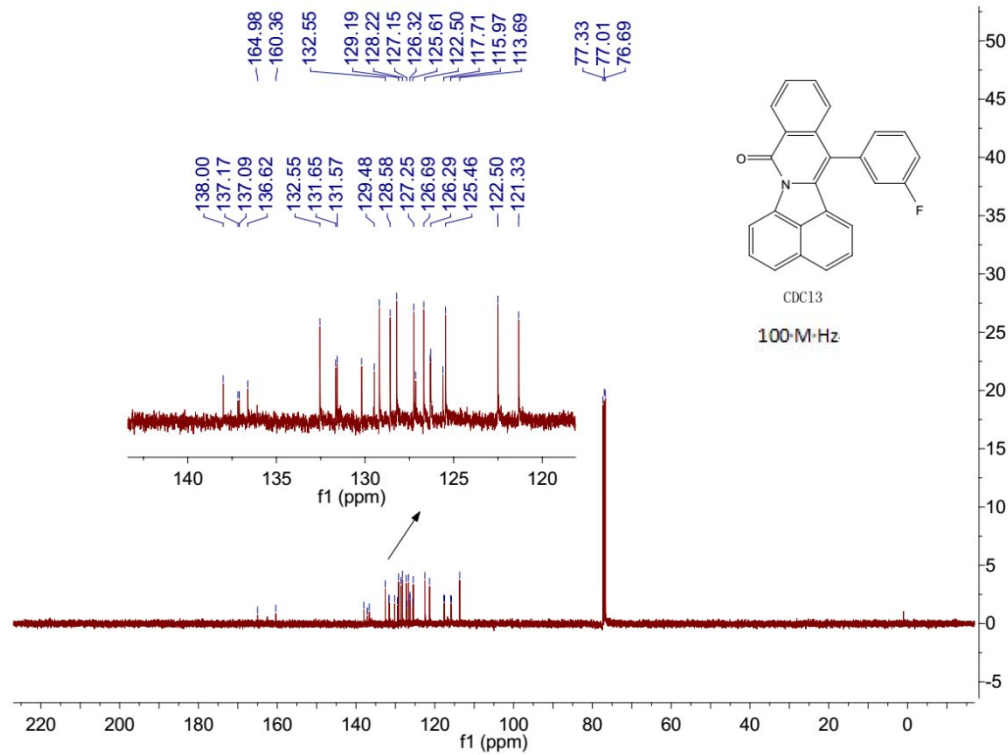

**Figure S17**  $^1\text{H}$ -NMR spectrum of **2i**

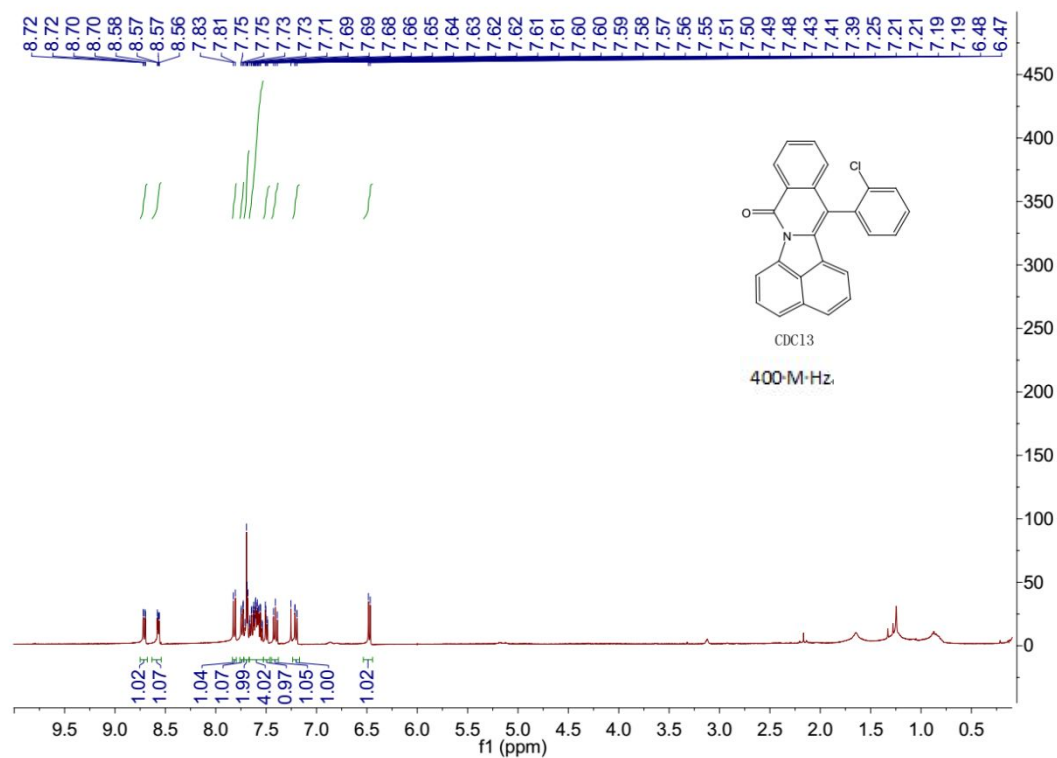

**Figure S18**  $^{13}\text{C}$ -NMR spectrum of **2i**

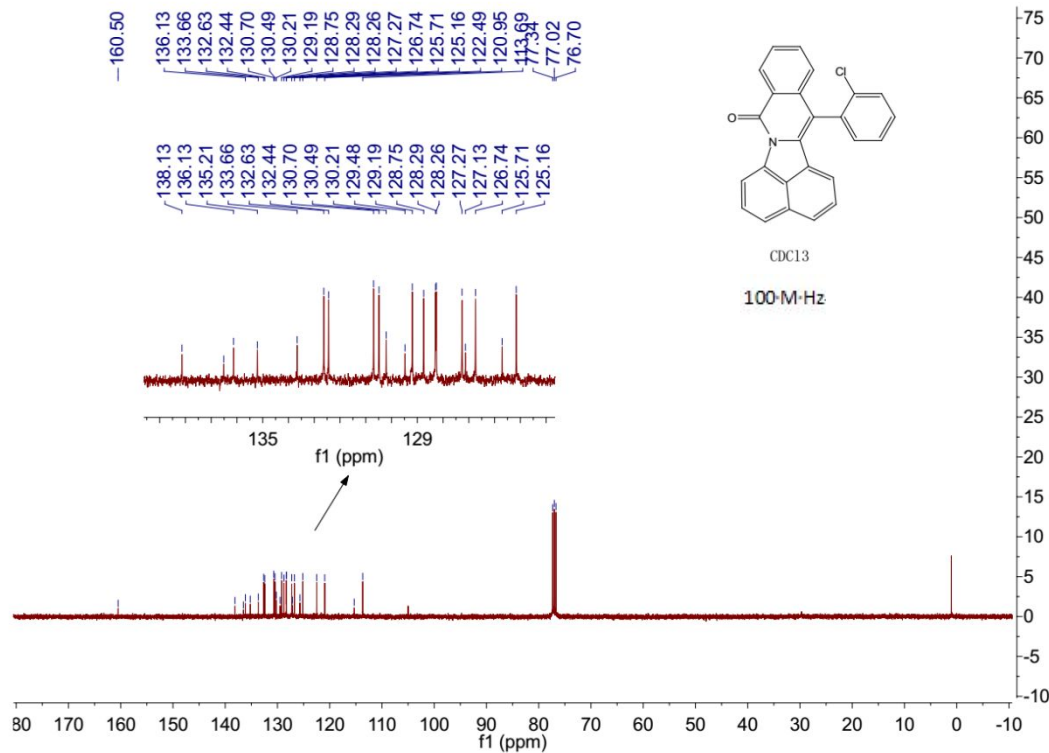



**Figure S19**  $^1\text{H}$ -NMR spectrum of **2j**

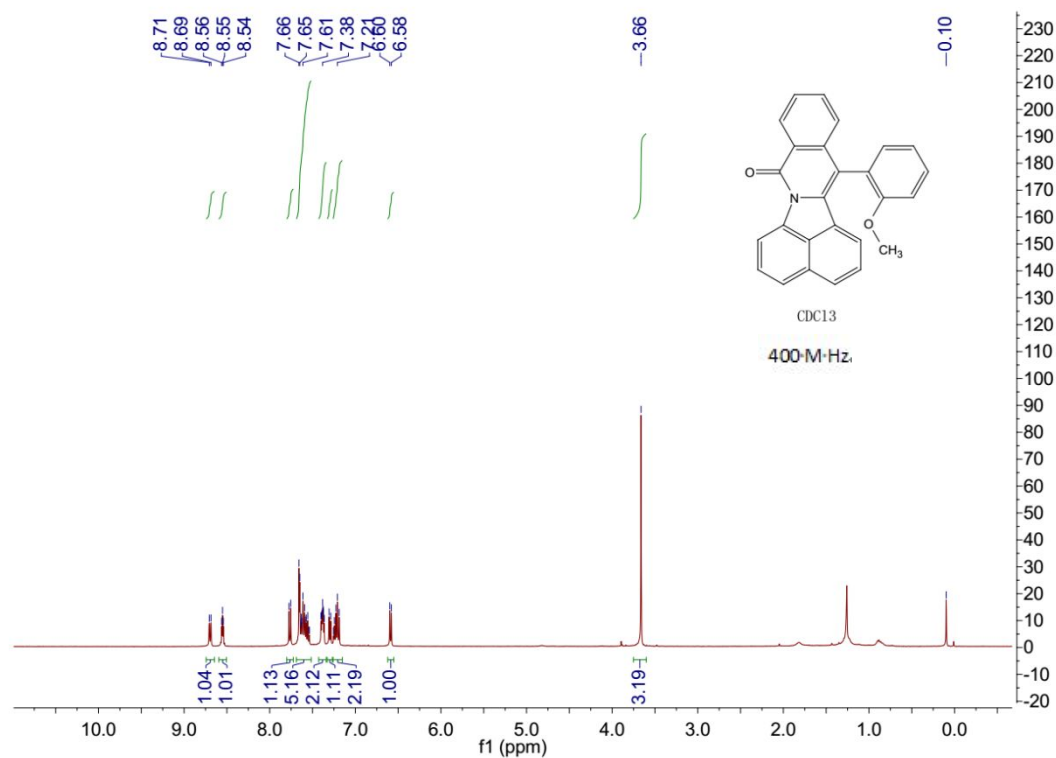

**Figure S20**  $^{13}\text{C}$ -NMR spectrum of **2j**

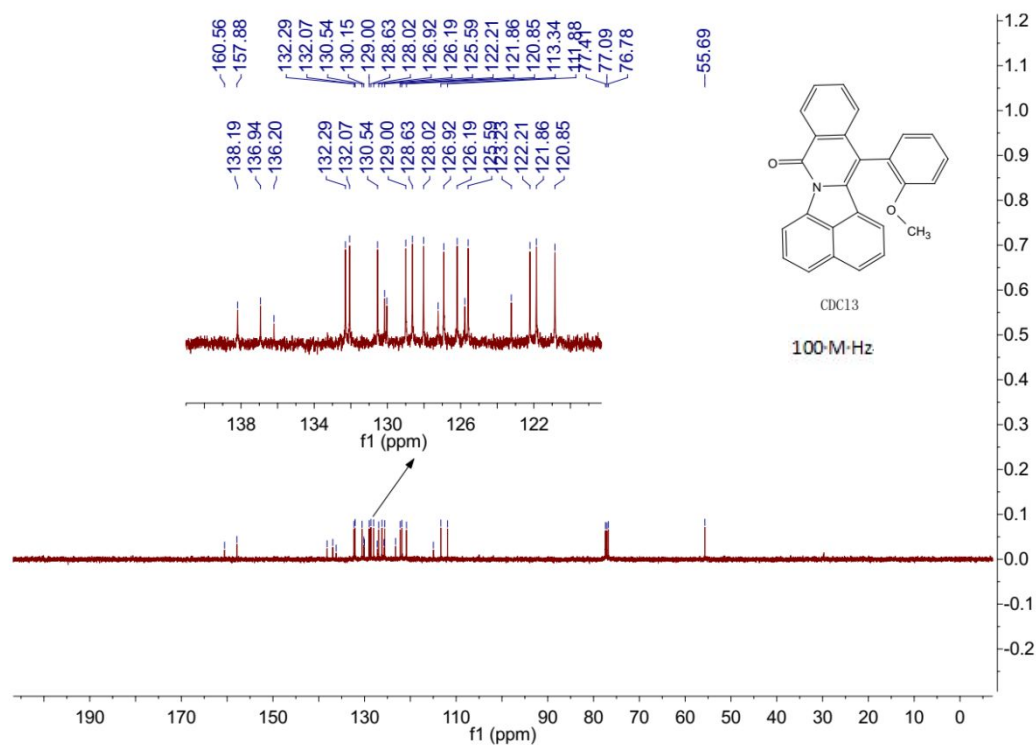



**Figure S21**  $^1\text{H}$ -NMR spectrum of **2k**

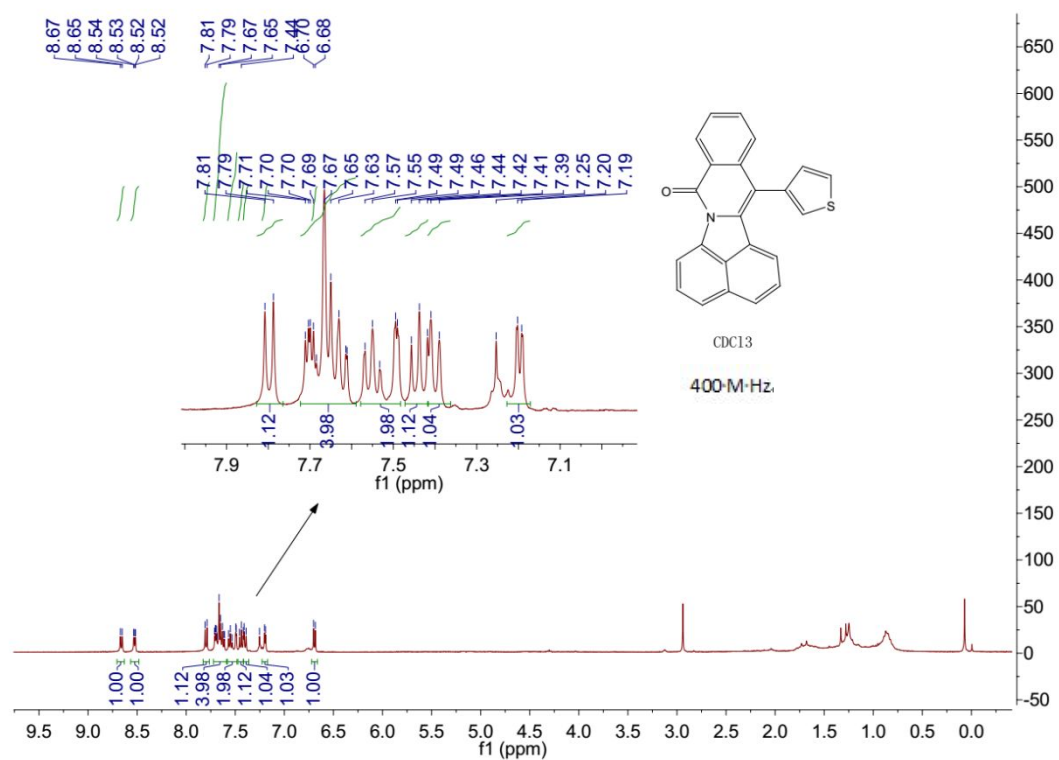

**Figure S22**  $^{13}\text{C}$ -NMR spectrum of **2k**

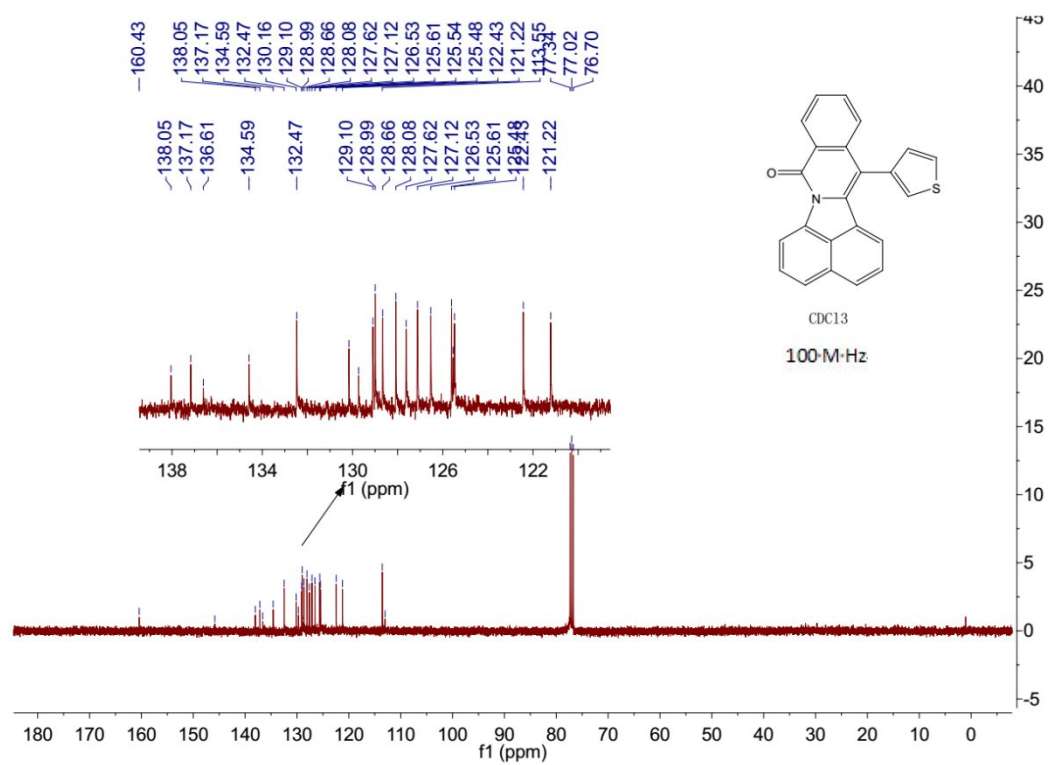

**Figure S23**  $^1\text{H}$ -NMR spectrum of **2l**

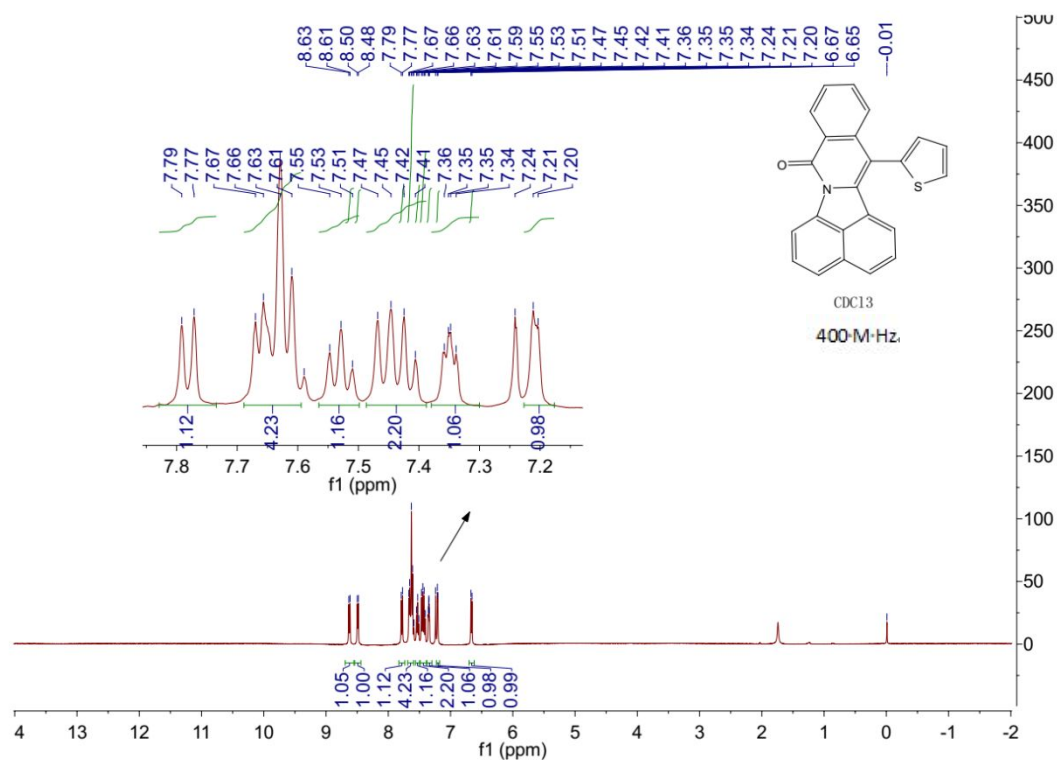

**Figure S24**  $^{13}\text{C}$ -NMR spectrum of **2l**

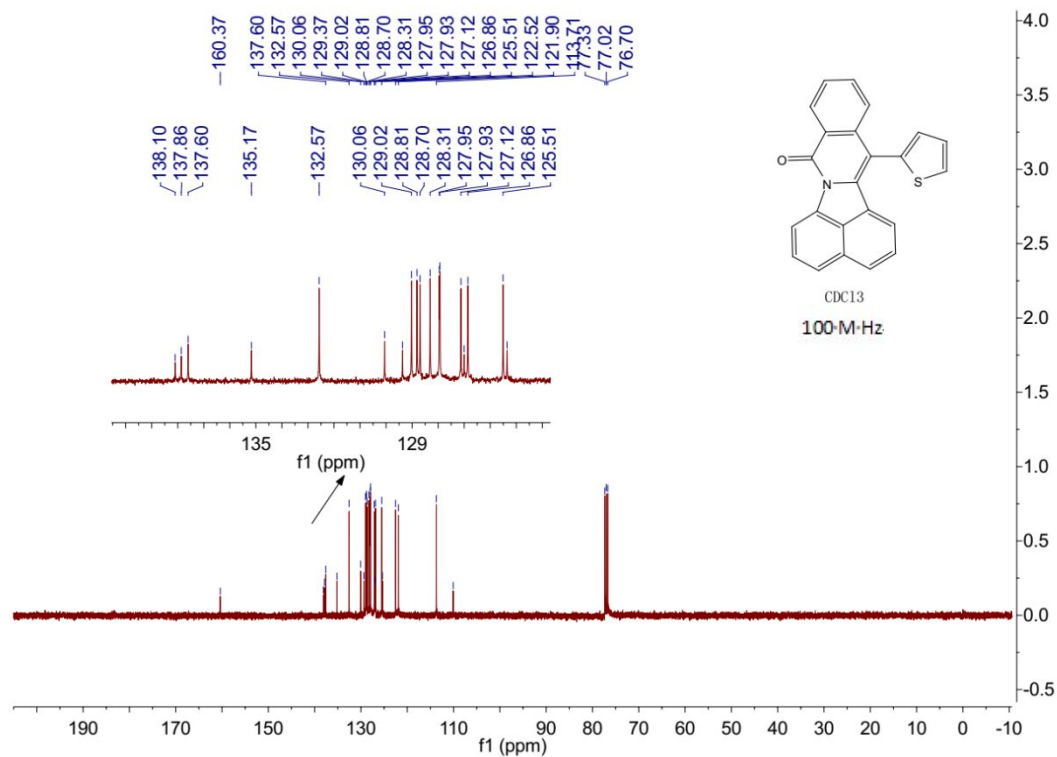

Figure S25  $^1\text{H}$ -NMR spectrum of **2m**

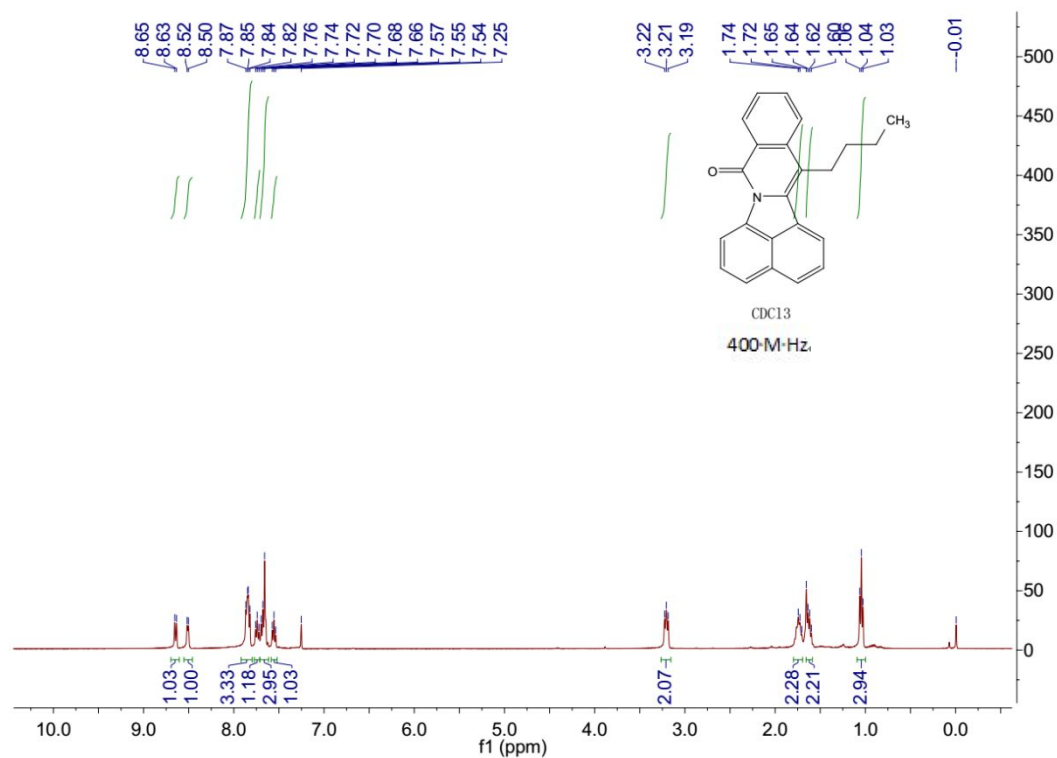

Figure S26  $^{13}\text{C}$ -NMR spectrum of **2m**

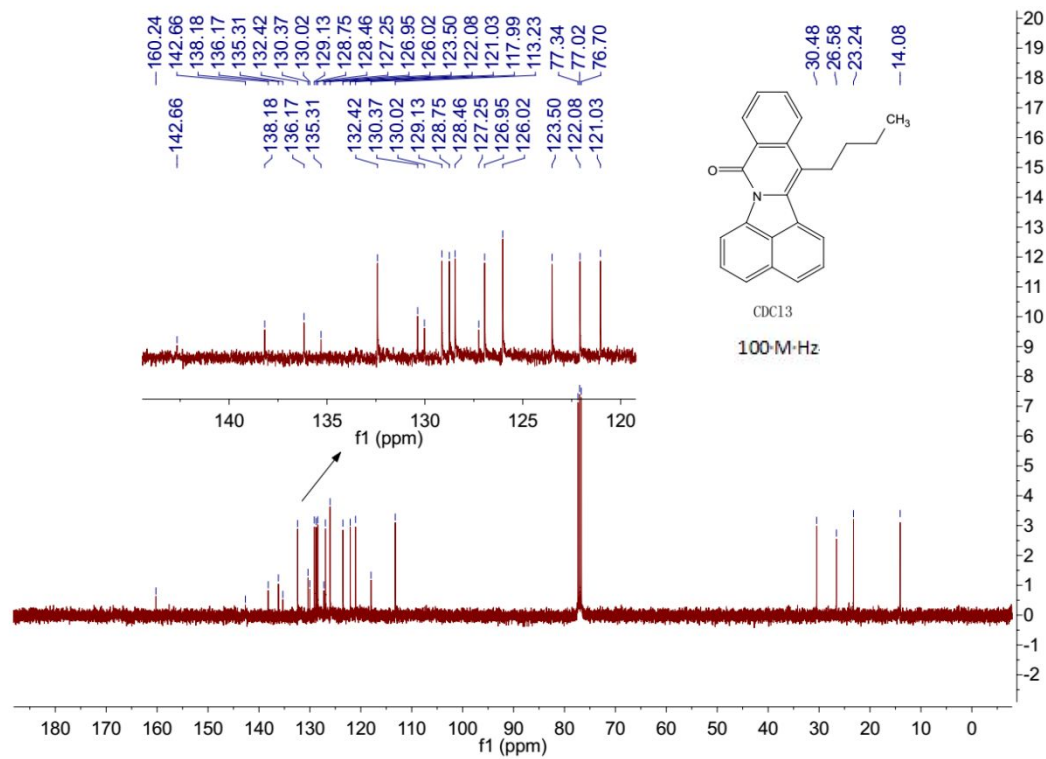

**Figure S27**  $^1\text{H}$ -NMR spectrum of **4a**

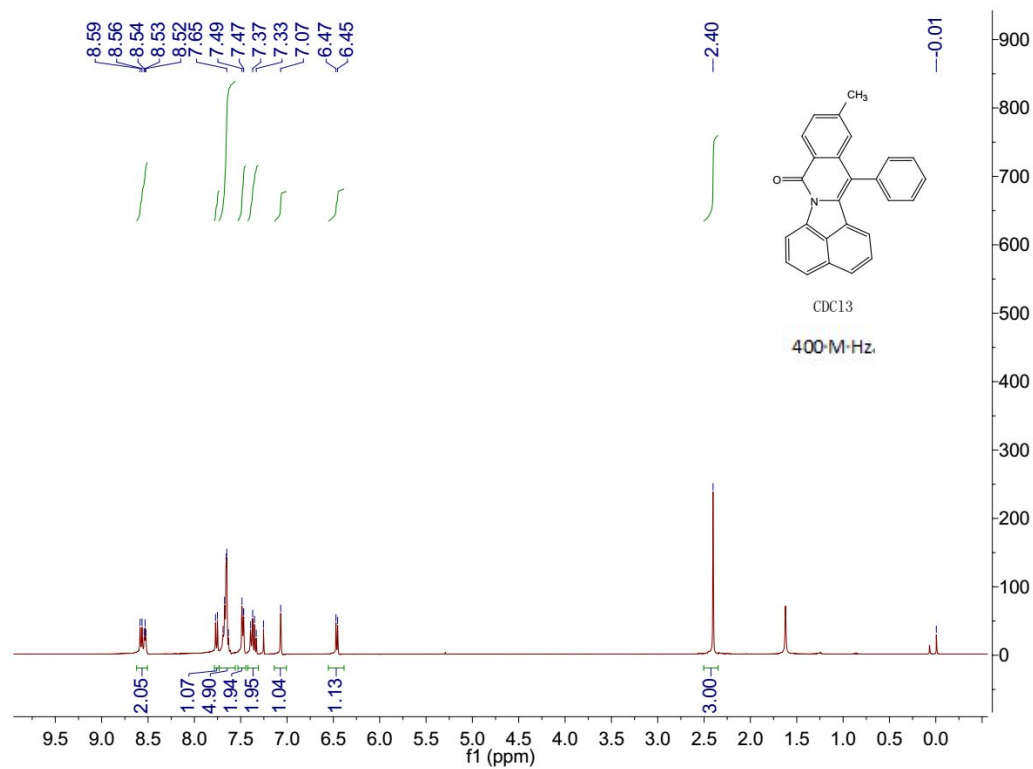

**Figure S28**  $^{13}\text{C}$ -NMR spectrum of **4a**

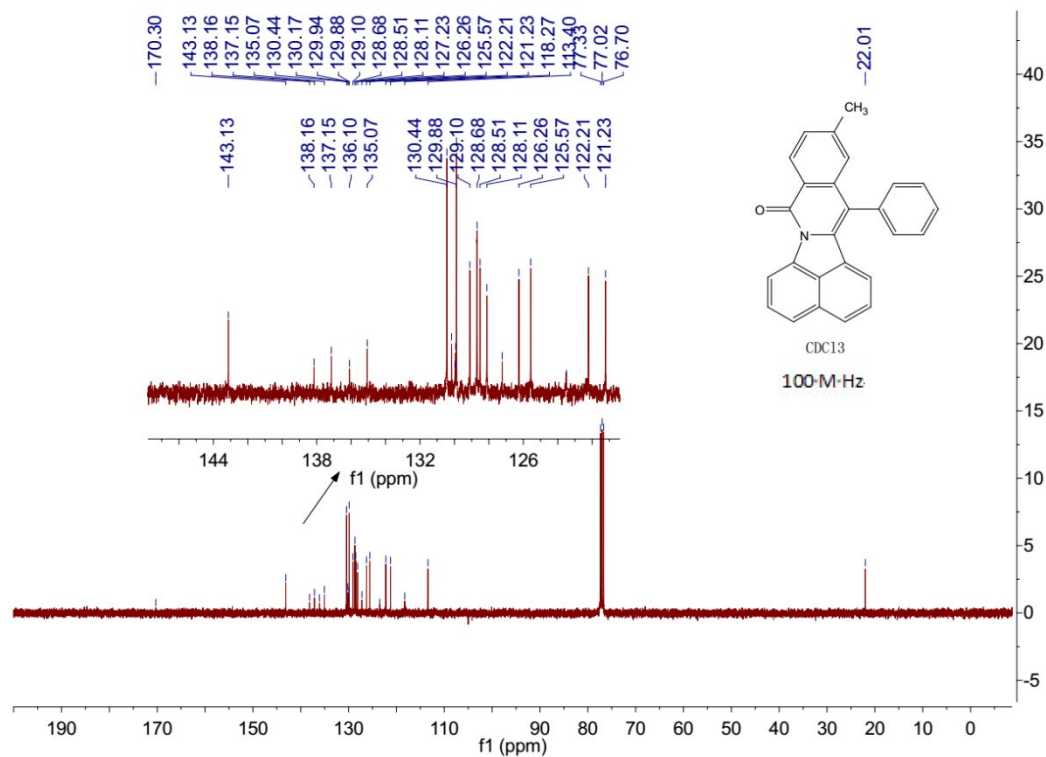

**Figure S29**  $^1\text{H}$ -NMR spectrum of **4b**

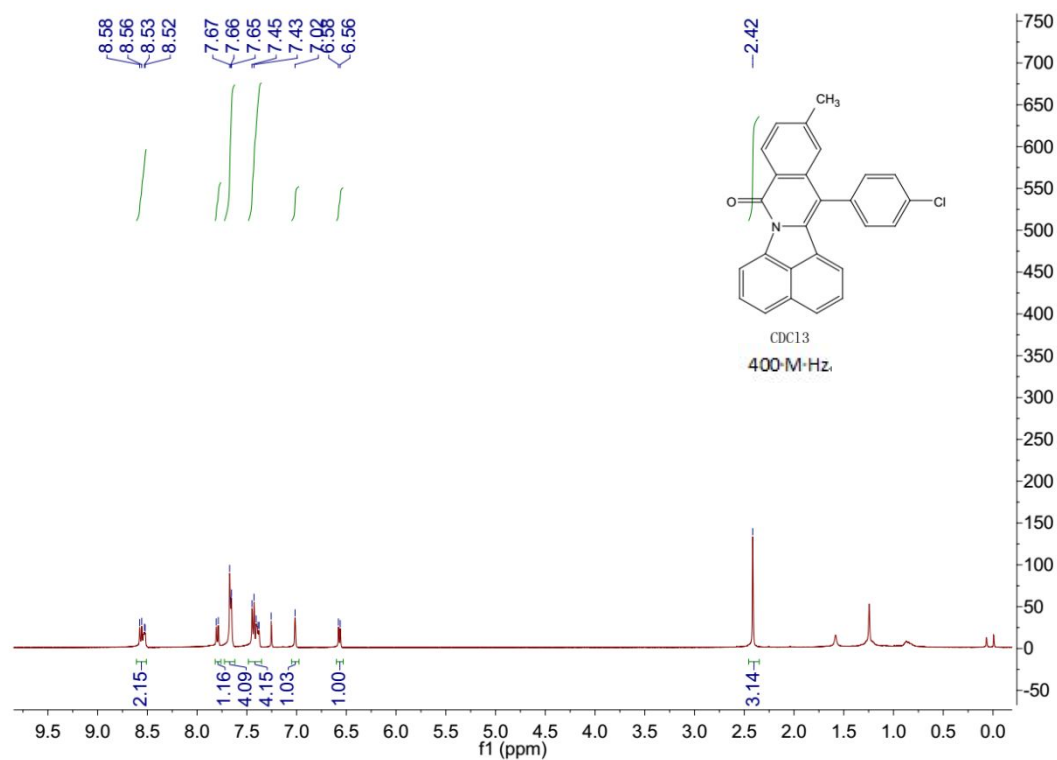

**Figure S30**  $^{13}\text{C}$ -NMR spectrum of **4b**

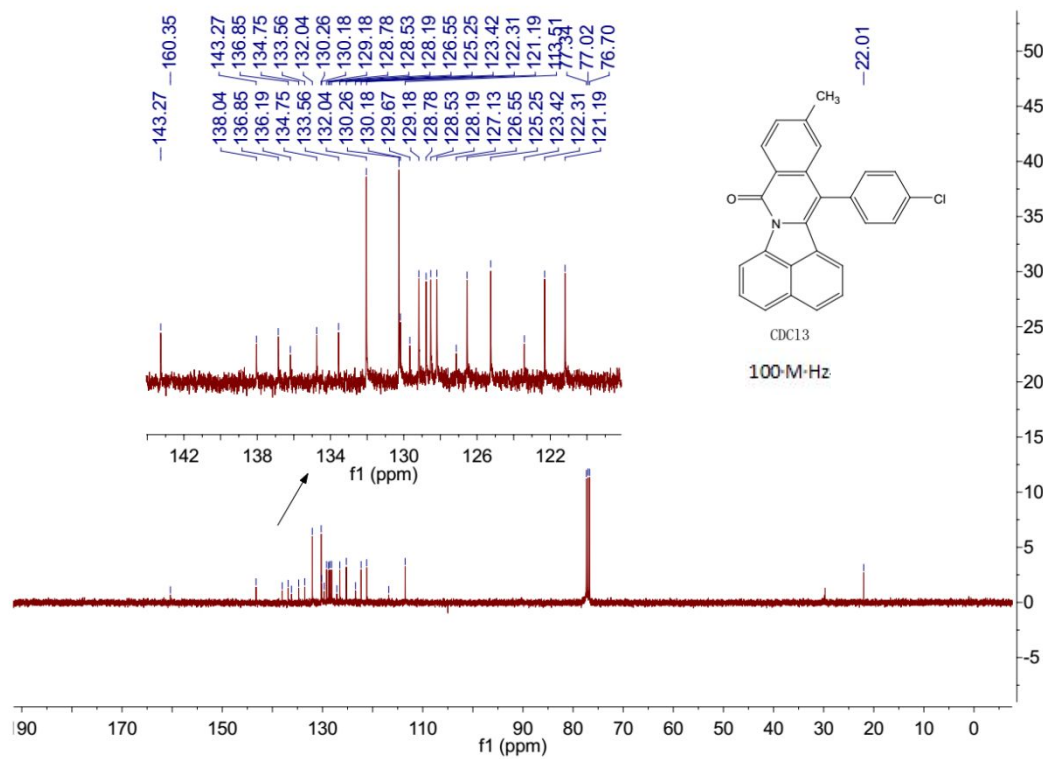

Chemical structure of 2-(2,6-dichlorophenyl)-1-phenylisoquinolin-3(1H)-one is shown. The  $^1\text{H}$  NMR spectrum (400 MHz,  $\text{CDCl}_3$ ) displays peaks corresponding to the structure. The x-axis represents the chemical shift in ppm ( $\delta$ ), ranging from 10.5 to -0.5. The y-axis represents the intensity. The spectrum shows aromatic signals between 6.5 and 8.7 ppm, a solvent triplet at 7.26 ppm, and aliphatic signals at 1.50 and 1.55 ppm. Integration values are provided below the peaks.

| Chemical Shift ( $\delta$ , ppm)   | Integration                  |
|------------------------------------|------------------------------|
| 8.68, 8.67, 8.53, 8.51             | 1.05, 1.04                   |
| 7.78, 7.69, 7.64, 7.59, 7.47, 7.46 | 1.12, 3.24, 2.91, 1.98, 1.24 |
| 7.26 (solvent)                     | 1.00                         |
| 6.05                               | 1.00                         |
| 1.55                               | 1.00                         |
| 1.50                               | 1.00                         |

Chemical structure of 100-M-Hz (100-M-Hz) is shown as an inset. The structure is a tricyclic system consisting of a benzene ring fused to a pyridine ring, which is further fused to a benzene ring. The pyridine ring has a carbonyl group (C=O) at position 2 and a chlorine atom (Cl) at position 4. The benzene ring at position 3 has a phenyl group (C6H5) attached. The solvent is CDCl3 and the concentration is 100-M-Hz.

The <sup>13</sup>C NMR spectrum (f1 (ppm)) shows peaks at the following chemical shifts (ppm): 137.15, 136.87, 135.75, 132.70, 132.58, 131.79, 131.07, 130.54, 129.97, 129.86, 129.52, 129.21, 129.07, 128.94, 128.78, 128.72, 128.64, 128.64, 128.41, 127.08, 127.01, 127.01, 123.11, 123.04, 116.61, 114.10, 77.32, 77.00, 76.68.



Chemical structure of compound 10: O=C1c2cc(Cl)c(Cl)cc2C3=C(N1C4=CC=CC=C4)C5=CC=CC=C5C6=CC=C(C=C6)Cl

<sup>1</sup>H NMR spectrum (CDCl<sub>3</sub>) of compound 10. The x-axis represents the chemical shift in ppm (f1), ranging from 0.0 to 9.0. The y-axis represents the intensity in arbitrary units, ranging from -50 to 750. The spectrum shows several peaks in the aromatic region (6.2-8.7 ppm) and a reference peak at 0.0 ppm. Integration values are provided below the peaks.

| Chemical Shift (ppm)               | Integration            |
|------------------------------------|------------------------|
| 8.68, 8.54, 8.52                   | 1.00, 1.12             |
| 7.72, 7.68, 7.60, 7.43, 7.39, 7.25 | 1.15, 3.20, 2.07, 3.23 |
| 6.22, 6.20                         | 1.17                   |
| 0.06, 0.01                         | -                      |

**13**

Chemical structure of **13** is shown, a fluorene derivative with two 4-chlorophenyl groups and a carbonyl group.

<sup>13</sup>C NMR spectrum (CDCl<sub>3</sub>) of **13**. The spectrum shows peaks corresponding to the structure, with the solvent triplet (CDCl<sub>3</sub>) visible at 77.00 ppm.

Chemical shift values (ppm) labeled on the spectrum:

- 158.32
- 135.82
- 132.12
- 129.88
- 129.05
- 128.83
- 127.49
- 127.40
- 123.24
- 122.98
- 114.24
- 138.18
- 135.82
- 135.49
- 135.38
- 134.80
- 132.89
- 132.33
- 132.12
- 130.02
- 129.88
- 129.61
- 129.05
- 128.83
- 128.69
- 127.49
- 127.40
- 77.32
- 77.00
- 76.69

**Figure S35**  $^1\text{H}$ -NMR spectrum of **4e**

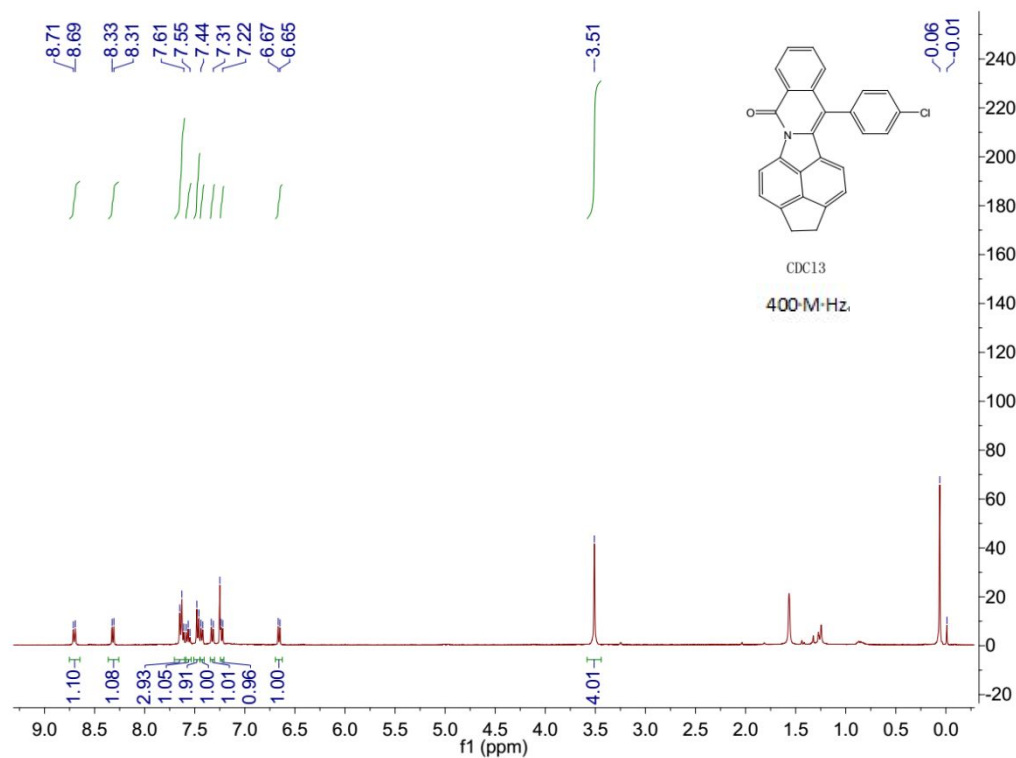

**Figure S36**  $^{13}\text{C}$ -NMR spectrum of **4e**

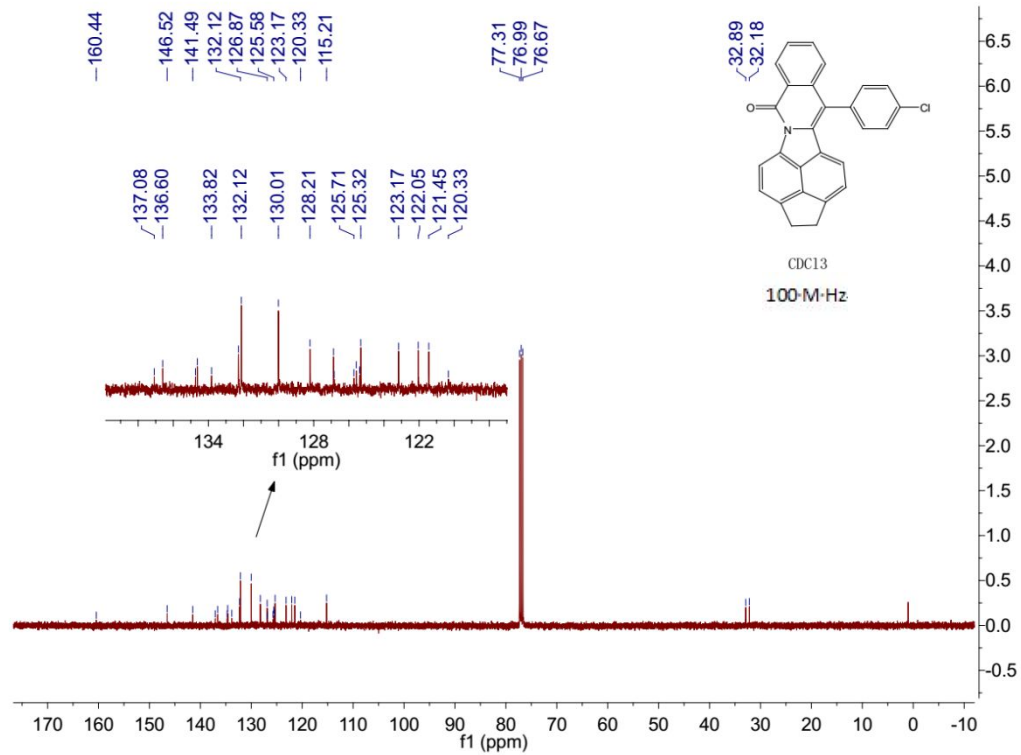



**Figure S37**  $^1\text{H}$ -NMR spectrum of **4f**

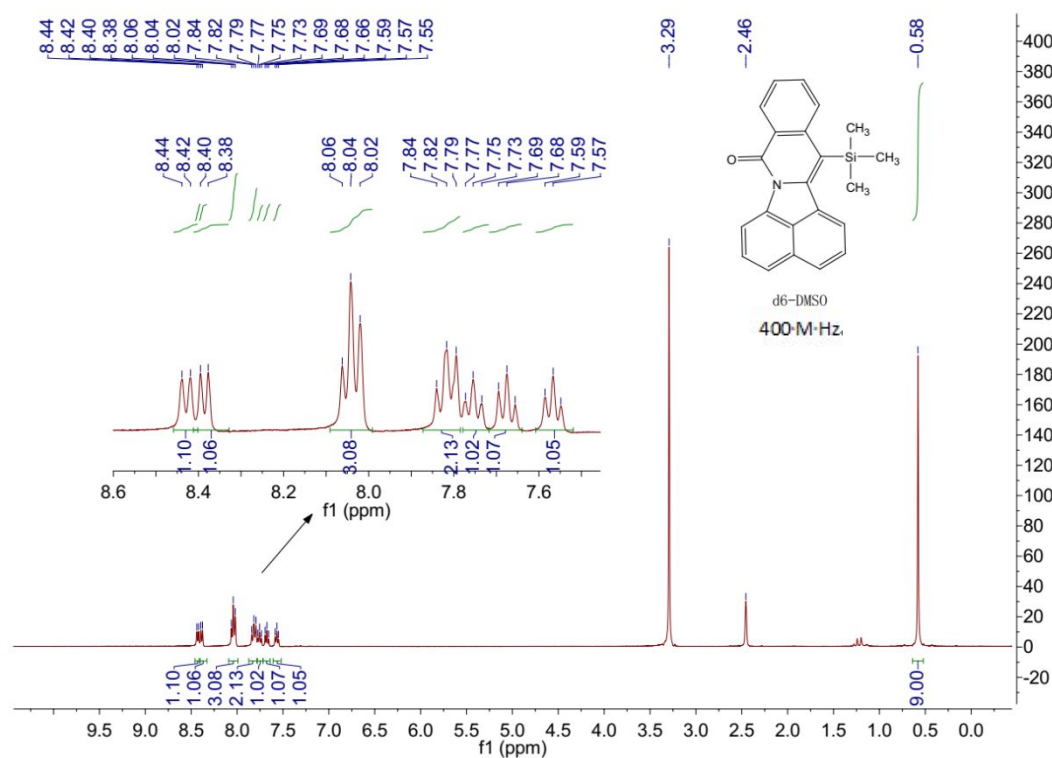

**Figure S38**  $^{13}\text{C}$ -NMR spectrum of **4f**

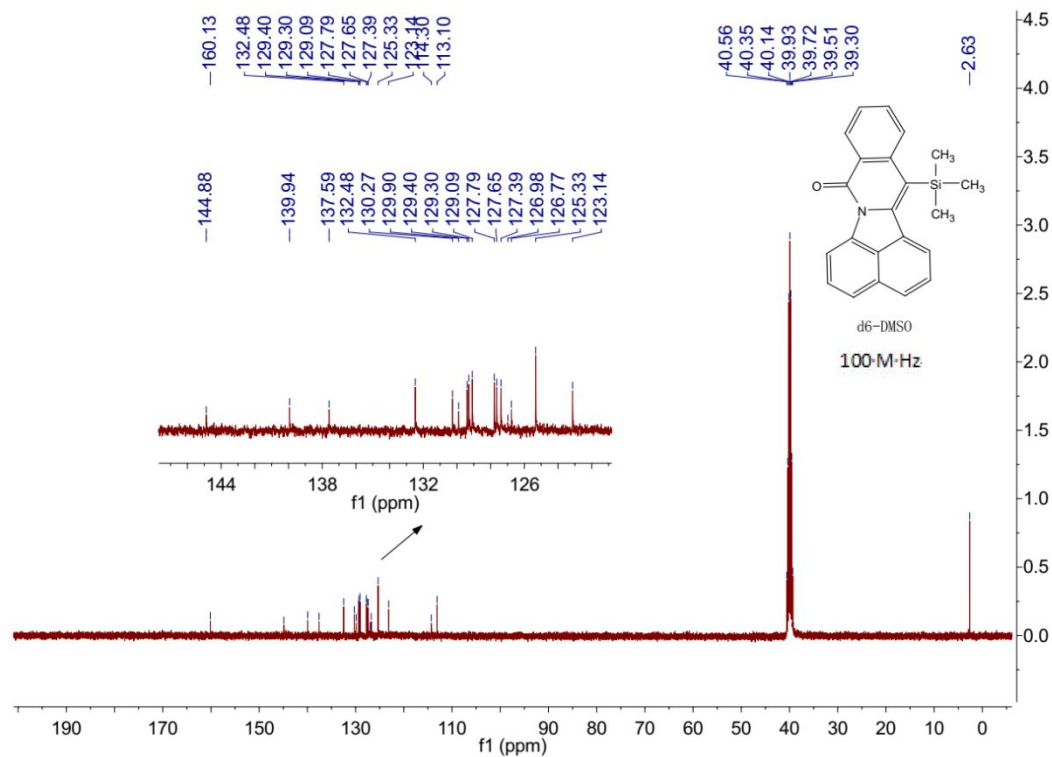

**Figure S39**  $^1\text{H}$ -NMR spectrum of **5**

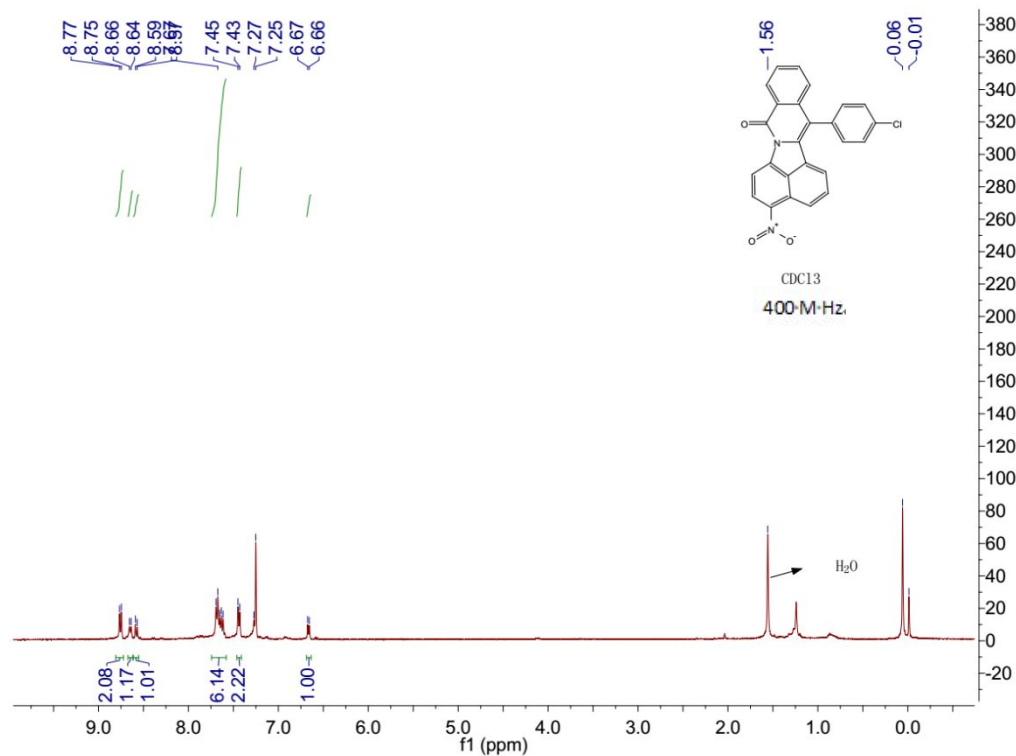

**Figure S40**  $^{13}\text{C}$ -NMR spectrum of **5**

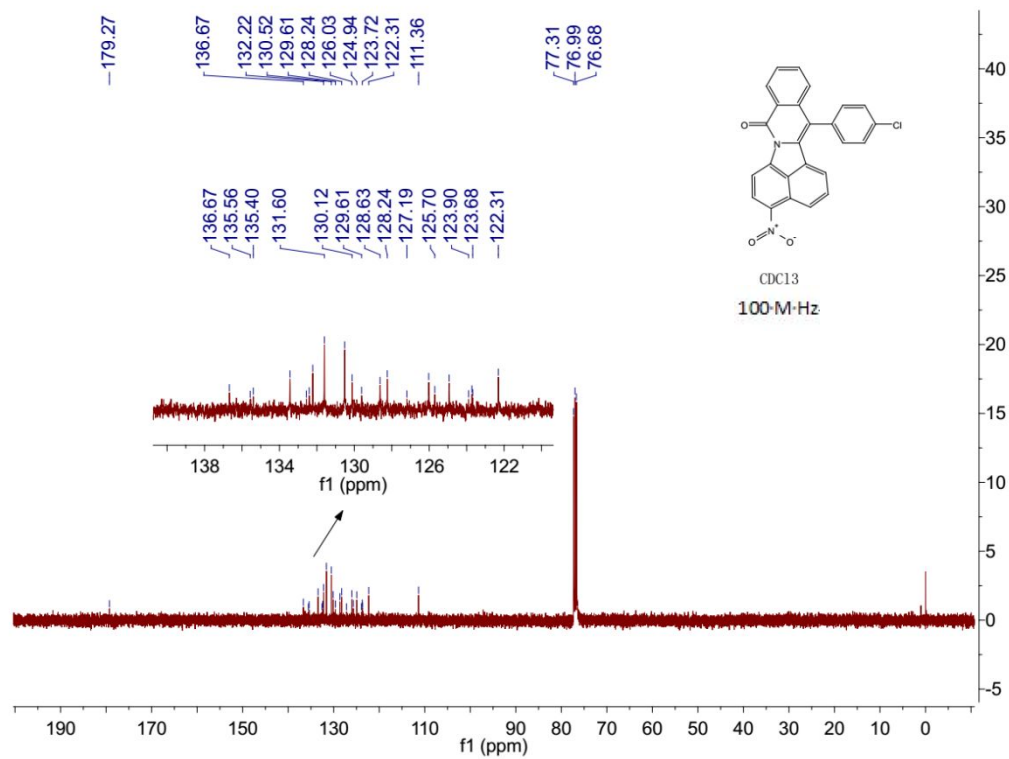

**Figure S41**  $^1\text{H}$ -NMR spectrum of **6**

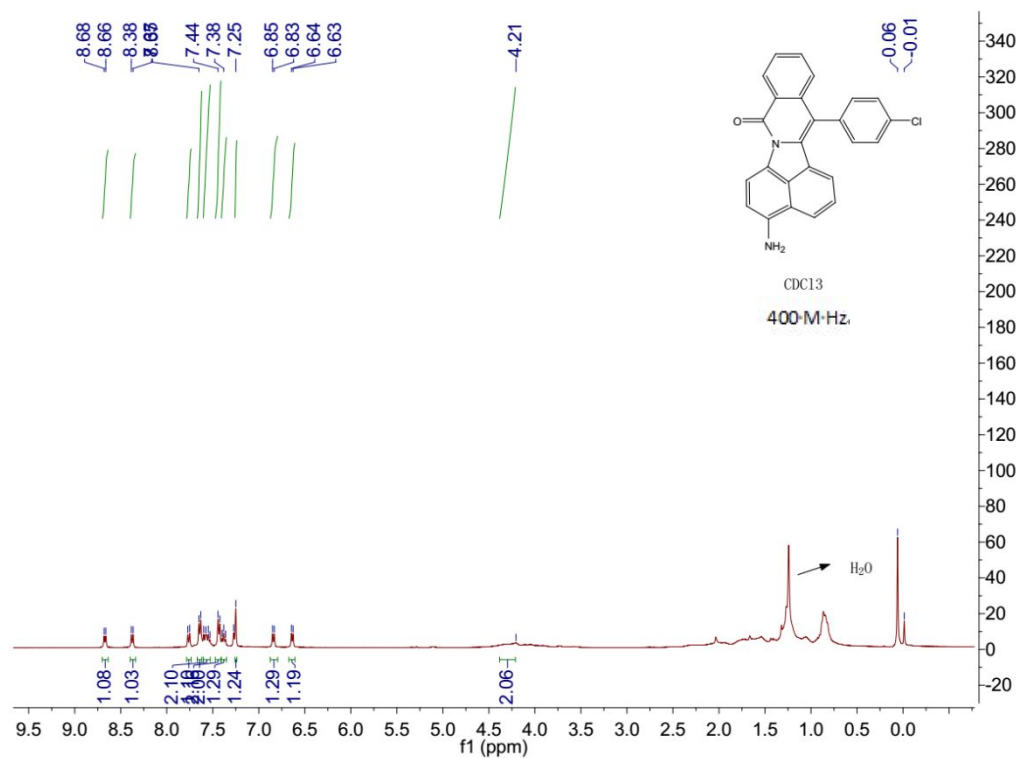

**Figure S42**  $^{13}\text{C}$ -NMR spectrum of **6**

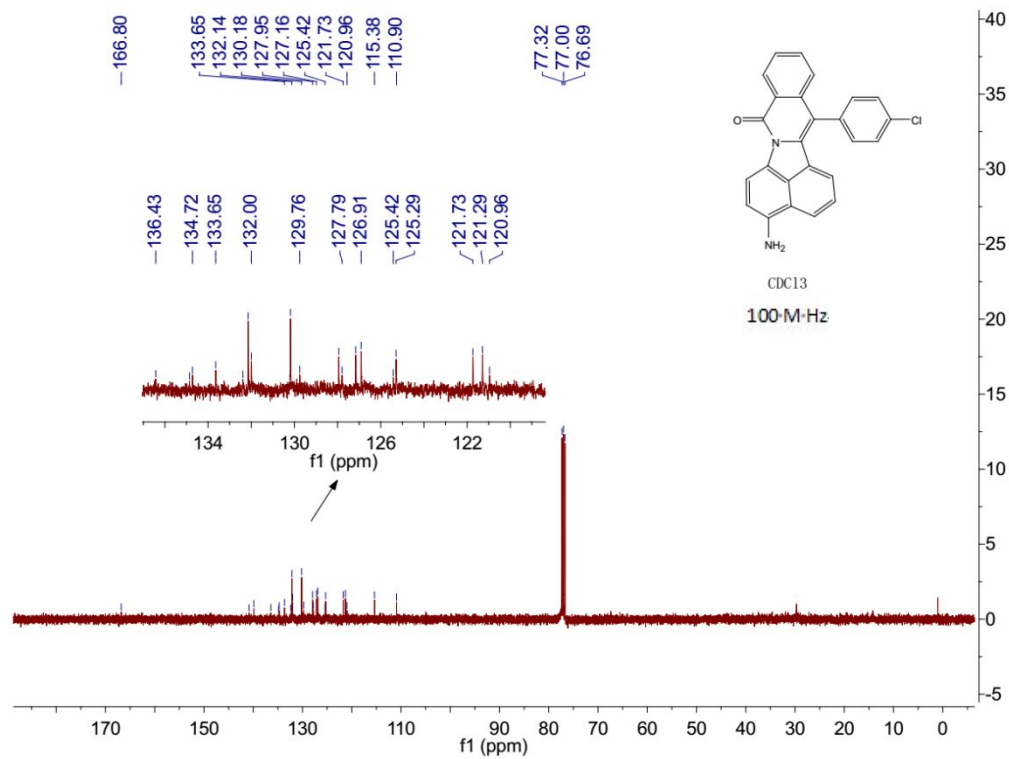

Supplement: Supplementary file 1 [file 24065017]
